# Supplementary material for: Identification and molecular detection of the pathogen of Phalaenopsis leaf yellowing through genome analysis
Source: Front Microbiol. 2024 Sep 24;15:1431813. doi: 10.3389/fmicb.2024.1431813 (PMC11472846; doi:10.3389/fmicb.2024.1431813)
Supplement: Supplementary file 4 [file Data_Sheet_4.XLSX]

## Sheet: Supplementary data sheet  4
Supplementary data sheet 4. Gene description of secreted proteins, effectors, carbohydrate-active enzymes (CAZys) on "lineage specific (LS) region" of Fusarium phalaenopsidis
					Prediction of effector		Prediction of CAZys
Contig ID	Gene ID	Gene Name	Pfam	Prediction of secretory	Prediction score Cytoplasmic/apoplastic effector	Effector	Family name
contig_32290-LS region	g6774	hypothetical protein	Oxidoreductase family, C-terminal alpha/beta domain	NO	-/-	NO	NO
contig_32290-LS region	g6775	hypothetical protein	Oxidoreductase family, NAD-binding Rossmann fold	NO	-/-	NO	NO
contig_32290-LS region	g6776	hypothetical protein	FAD binding domain	NO	-/-	NO	NO
contig_32290-LS region	g6777	Acetyl-CoA acyltransferase	Thiolase, N-terminal domain;Thiolase, C-terminal domain	NO	-/-	NO	NO
contig_32290-LS region	g6778	Phosphotransferase enzyme family domain protein	Phosphotransferase enzyme family	NO	-/-	NO	NO
contig_32290-LS region	g6779	Acyl-CoA dehydrogenase	Acyl-CoA dehydrogenase, C-terminal domain;Acyl-CoA dehydrogenase, middle domain;Acyl-CoA dehydrogenase, N-terminal domain	NO	-/-	NO	NO
contig_32290-LS region	g6780	Abhydrolase_3 domain-containing protein	alpha/beta hydrolase fold	NO	-/-	NO	NO
contig_32290-LS region	g6781	Abhydrolase_3 domain-containing protein	alpha/beta hydrolase fold	NO	-/-	NO	NO
contig_32290-LS region	g6782	hypothetical protein	Acyl-CoA dehydrogenase, middle domain;Acyl-CoA dehydrogenase, N-terminal domain;Acyl-CoA dehydrogenase, C-terminal domain	NO	-/-	NO	NO
contig_32290-LS region	g6783	Peroxisomal hydratase-dehydrogenase-epimerase	short chain dehydrogenase;MaoC like domain	NO	-/-	NO	NO
contig_32290-LS region	g6784	Isoflavone reductase family protein	NmrA-like family	NO	-/-	NO	NO
contig_32290-LS region	g6785	3-hydroxy-3-methylglutarate-CoA lyase	Enoyl-CoA hydratase/isomerase;Cytochrome P450;HMGL-like	NO	-/-	NO	NO
contig_32290-LS region	g6786	Abhydrolase_3 domain-containing protein	alpha/beta hydrolase fold	NO	-/-	NO	NO
contig_32290-LS region	g6787	hypothetical protein	-	NO	-/-	NO	NO
contig_32290-LS region	g6788	hypothetical protein	-	Signal peptide/0.9845	-/-	NO	NO
contig_32290-LS region	g6789	Hypothetical protein	DDE superfamily endonuclease	NO	-/-	NO	NO
contig_32290-LS region	g6790	Coronin	-	NO	-/-	NO	NO
contig_32290-LS region	g6791	hypothetical protein	LysM domain	Signal peptide/0.9788	-/-	NO	CBM50
contig_32290-LS region	g6792	Chitinase	Chitin recognition protein;Glycosyl hydrolases family 18	Signal peptide/0.9885	-/-	NO	CBM18;GH18
contig_32290-LS region	g6793	Chitinase	-	NO	-/-	NO	CBM18;GH18
contig_32290-LS region	g6794	hypothetical protein	-	NO	-/-	NO	NO
contig_32290-LS region	g6795	hypothetical protein	-	NO	-/-	NO	NO
contig_32290-LS region	g6796	ANK_REP_REGION domain-containing protein	Ankyrin repeats (3 copies)	NO	-/-	NO	NO
contig_32290-LS region	g6797	Hypothetical protein	Sigma domain on NACHT-NTPases;N-terminal domain on NACHT_NTPase and P-loop NTPases	NO	-/-	NO	NO
contig_32290-LS region	g6798	hypothetical protein	-	NO	-/-	NO	NO
contig_32290-LS region	g6799	hypothetical protein	NACHT domain;Ankyrin repeats (3 copies);Phosphorylase superfamily;Ankyrin repeats (many copies);Ankyrin repeat	NO	-/-	NO	CBM18;GH18
contig_32290-LS region	g6800	hypothetical protein	FAD dependent oxidoreductase	NO	-/-	NO	GT58
contig_32290-LS region	g6801	hypothetical protein	Proline racemase	NO	-/-	NO	NO
contig_32290-LS region	g6802	hypothetical protein	-	Signal peptide/0.9996	-/-	NO	NO
contig_32290-LS region	g6803	Methyltransf_25 domain-containing protein	Methyltransferase domain	NO	-/-	NO	NO
contig_32290-LS region	g6804	Carrier domain-containing protein	Beta-ketoacyl synthase, N-terminal domain;Alcohol dehydrogenase GroES-like domain;Beta-ketoacyl synthase, C-terminal domain;Zinc-binding dehydrogenase;Phosphopantetheine attachment site;Ketoacyl-synthetase C-terminal extension;Polyketide synthase dehydratase;Acyl transferase domain;Methyltransferase domain;KR domain	NO	-/-	NO	NO
contig_32290-LS region	g6805	hypothetical protein	Methyltransferase domain	NO	-/-	NO	NO
contig_32290-LS region	g6806	GPR_Gpa2_C domain-containing protein	G protein-coupled glucose receptor regulating Gpa2;G protein-coupled glucose receptor regulating Gpa2 C-term	NO	-/-	NO	NO
contig_32290-LS region	g6807	Putative heterokaryon incompatibility protein or allele protein	Heterokaryon incompatibility protein (HET)	NO	-/-	NO	NO
contig_32290-LS region	g6808	Putative heterokaryon incompatibility protein or allele protein	-	NO	-/-	NO	NO
contig_32290-LS region	g6809	Extracellular metalloprotease	Pregnancy-associated plasma protein-A	Signal peptide/0.9896	-/-	NO	NO
contig_32290-LS region	g6810	HET domain-containing protein	Heterokaryon incompatibility protein (HET)	NO	-/-	NO	NO
contig_32290-LS region	g6811	hypothetical protein	-	NO	-/-	NO	NO
contig_32290-LS region	g6812	FAD-binding PCMH-type domain-containing protein	FAD binding domain;Berberine and berberine like	Signal peptide/0.9946	-/-	NO	NO
contig_32290-LS region	g6813	Protein kinase domain-containing protein	Protein kinase domain	NO	-/-	NO	NO
contig_32290-LS region	g6814	hypothetical protein	NAD(P)-binding Rossmann-like domain	Signal peptide/0.8539	-/-	NO	NO
contig_32290-LS region	g6815	hypothetical protein	Phenol hydroxylase, C-terminal dimerisation domain;FAD binding domain	NO	-/-	NO	NO
contig_32290-LS region	g6816	hypothetical protein	Heterokaryon incompatibility protein (HET)	NO	-/-	NO	NO
contig_32290-LS region	g6817	hypothetical protein	short chain dehydrogenase	NO	-/-	NO	NO
contig_32290-LS region	g6818	AB hydrolase-1 domain-containing protein	Alpha/beta hydrolase family	Signal peptide/0.9679	-/-	NO	NO
contig_32290-LS region	g6819	MFS domain-containing protein	Major Facilitator Superfamily	NO	-/-	NO	NO
contig_32290-LS region	g6820	hypothetical protein	Methyltransferase domain	NO	-/-	NO	NO
contig_32290-LS region	g6821	MFS domain-containing protein	NAD(P)H-binding;Major Facilitator Superfamily	NO	-/-	NO	NO
contig_32290-LS region	g6822	Related to phenol 2-monooxygenase	FAD binding domain	NO	-/-	NO	NO
contig_32290-LS region	g6823	Zn(2)-C6 fungal-type domain-containing protein	Fungal specific transcription factor domain	NO	-/-	NO	NO
contig_32290-LS region	g6824	Related to acetoacetyl-CoA synthetase	AMP-binding enzyme	NO	-/-	NO	NO
contig_32290-LS region	g6825	Fumarylacetoacetate hydrolase	Fumarylacetoacetate (FAA) hydrolase family;Domain of unknown function (DUF2437)	NO	-/-	NO	NO
contig_32290-LS region	g6826	Related to 2,3-dihydroxybiphenyl-1,2-dioxygenase	Glyoxalase/Bleomycin resistance protein/Dioxygenase superfamily	NO	-/-	NO	NO
contig_32290-LS region	g6827	FAD_binding_3 domain-containing protein	FAD binding domain	NO	-/-	NO	NO
contig_32290-LS region	g6828	Zn(2)-C6 fungal-type domain-containing protein	-	NO	-/-	NO	NO
contig_32290-LS region	g6829	AMP-binding domain-containing protein	AMP-binding enzyme;AMP-binding enzyme C-terminal domain	NO	-/-	NO	NO
contig_32290-LS region	g6830	hypothetical protein	-	NO	-/-	NO	NO
contig_32290-LS region	g6831	hypothetical protein	Pyridine nucleotide-disulphide oxidoreductase	NO	-/-	NO	NO
contig_32290-LS region	g6832	hypothetical protein	-	NO	-/-	NO	NO
contig_32290-LS region	g6833	MFS domain-containing protein	Major Facilitator Superfamily	NO	-/-	NO	NO
contig_32290-LS region	g6834	hypothetical protein	Dihydrodipicolinate synthetase family	NO	-/-	NO	NO
contig_32290-LS region	g6835	Probable CYB2-lactate dehydrogenase cytochrome b2	Cytochrome b5-like Heme/Steroid binding domain;FMN-dependent dehydrogenase	NO	-/-	NO	NO
contig_32290-LS region	g6836	Epimerase domain-containing protein	NAD dependent epimerase/dehydratase family	NO	-/-	NO	NO
contig_32290-LS region	g6837	Sialidase domain-containing protein	BNR repeat-like domain	NO	-/-	NO	GH33
contig_32290-LS region	g6838	hypothetical protein	Aldo/keto reductase family	NO	-/-	NO	NO
contig_32290-LS region	g6839	Fungal_trans domain-containing protein	Fungal Zn(2)-Cys(6) binuclear cluster domain	NO	-/-	NO	NO
contig_32290-LS region	g6840	hypothetical protein	Sugar-binding N-terminal domain;Nucleotide-binding C-terminal domain	NO	-/-	NO	NO
contig_32290-LS region	g6841	hypothetical protein	PAN domain	Signal peptide/0.9993	Y (0.547)/Y (0.777)	Apoplastic/cytoplasmic effector	NO
contig_32290-LS region	g6842	hypothetical protein	-	Signal peptide/0.9929	-/-	NO	NO
contig_32290-LS region	g6843	Histidinol dehydrogenase	Histidinol dehydrogenase	NO	-/-	NO	NO
contig_32290-LS region	g6844	Cupin_2 domain-containing protein	Cupin domain	NO	-/-	NO	NO
contig_32290-LS region	g6845	hypothetical protein	Fungal specific transcription factor domain	NO	-/-	NO	NO
contig_32290-LS region	g6846	FAD-binding PCMH-type domain-containing protein	FAD binding domain	NO	-/-	NO	NO
contig_32290-LS region	g6847	hypothetical protein	Enoyl-(Acyl carrier protein) reductase	NO	-/-	NO	NO
contig_32290-LS region	g6848	MFS domain-containing protein	Major Facilitator Superfamily	NO	-/-	NO	NO
contig_32290-LS region	g6849	FAD_binding_3 domain-containing protein	FAD binding domain;Acetoacetate decarboxylase (ADC);FAD dependent oxidoreductase	NO	-/-	NO	NO
contig_32290-LS region	g6850	hypothetical protein	Major Facilitator Superfamily	NO	-/-	NO	NO
contig_32290-LS region	g6851	hypothetical protein	Luciferase-like monooxygenase	NO	-/-	NO	NO
contig_32290-LS region	g6852	hypothetical protein	OPT oligopeptide transporter protein	NO	-/-	NO	NO
contig_32290-LS region	g6853	hypothetical protein	Glycosyl hydrolase family 71	Signal peptide/0.9349	-/-	NO	GH71
contig_32290-LS region	g6854	hypothetical protein	-	NO	-/-	NO	NO
contig_32290-LS region	g6855	hypothetical protein	Sugar (and other) transporter	NO	-/-	NO	NO
contig_32290-LS region	g6856	hypothetical protein	-	NO	-/-	NO	NO
contig_32290-LS region	g6857	HET domain-containing protein	Heterokaryon incompatibility protein (HET)	NO	-/-	NO	NO
contig_32290-LS region	g6858	hypothetical protein	-	Signal peptide/0.9911	-/Y (0.532)	Apoplastic effector	NO
contig_32290-LS region	g6859	hypothetical protein	SnoaL-like polyketide cyclase	NO	-/-	NO	NO
contig_32290-LS region	g6860	DAO domain-containing protein	FAD dependent oxidoreductase	NO	-/-	NO	NO
contig_32290-LS region	g6861	Carboxylic ester hydrolase	Carboxylesterase family	NO	-/-	NO	NO
contig_32290-LS region	g6862	hypothetical protein	-	NO	-/-	NO	NO
contig_32290-LS region	g6863	hypothetical protein	Major Facilitator Superfamily	NO	-/-	NO	NO
contig_32290-LS region	g6864	MFS domain-containing protein	Sugar (and other) transporter	NO	-/-	NO	NO
contig_32290-LS region	g6865	Beta-glucosidase	Glycosyl hydrolase family 3 N terminal domain;Fibronectin type III-like domain;Glycosyl hydrolase family 3 C-terminal domain	NO	-/-	NO	GH3
contig_32290-LS region	g6866	hypothetical protein	GDSL-like Lipase/Acylhydrolase family;Carbohydrate esterase 2 N-terminal	Signal peptide/0.9899	-/-	NO	CE2
contig_32290-LS region	g6867	hypothetical protein	-	Signal peptide/0.9977	-/Y (0.732)	Apoplastic effector	NO
contig_32290-LS region	g6868	Pyr_redox_2 domain-containing protein	Pyridine nucleotide-disulphide oxidoreductase	NO	-/-	NO	NO
contig_32290-LS region	g6869	hypothetical protein	-	Signal peptide/0.9774	Y (0.812)/-	Cytoplasmic effector	NO
contig_32290-LS region	g6870	Bulb-type lectin domain-containing protein	-	NO	-/-	NO	NO
contig_32290-LS region	g6871	ATP-dependent DNA helicase	PIF1-like helicase	NO	-/-	NO	NO
contig_32290-LS region	g6872	RelA_SpoT domain-containing protein	Region found in RelA / SpoT proteins	NO	-/-	NO	NO
contig_32290-LS region	g6873	hypothetical protein	-	Signal peptide/0.9747	-/-	NO	NO
contig_32290-LS region	g6874	hypothetical protein	-	NO	-/-	NO	NO
contig_32290-LS region	g6875	hypothetical protein	Methyltransferase domain	NO	-/-	NO	NO
contig_32290-LS region	g6876	hypothetical protein	-	NO	-/-	NO	NO
contig_32290-LS region	g6877	CFEM domain-containing protein	-	NO	-/-	NO	NO
contig_32290-LS region	g6878	MFS domain-containing protein	-	NO	-/-	NO	NO
contig_32290-LS region	g6879	hypothetical protein	-	NO	-/-	NO	NO
contig_32290-LS region	g6880	MFS domain-containing protein	Major Facilitator Superfamily	NO	-/-	NO	GH31
contig_32290-LS region	g6881	Beta-lactamase-like protein	Alkyl sulfatase C-terminal;Metallo-beta-lactamase superfamily;Alkyl sulfatase dimerisation	NO	-/-	NO	NO
contig_32290-LS region	g6882	hypothetical protein	-	NO	-/-	NO	NO
contig_32290-LS region	g6883	AP_endonuc_2 domain-containing protein	Xylose isomerase-like TIM barrel	NO	-/-	NO	NO
contig_32290-LS region	g6884	FAD_binding_2 domain-containing protein	FAD binding domain	NO	-/-	NO	NO
contig_32290-LS region	g6885	Protein kinase-like protein	Phosphotransferase enzyme family	NO	-/-	NO	NO
contig_32290-LS region	g6886	Glutaminase	Glutaminase	NO	-/-	NO	NO
contig_32290-LS region	g6887	hypothetical protein	-	NO	-/-	NO	NO
contig_32290-LS region	g6888	hypothetical protein	Glycine-rich domain-containing protein-like	NO	-/-	NO	NO
contig_32290-LS region	g6889	hypothetical protein	-	NO	-/-	NO	NO
contig_32290-LS region	g6890	FAS1 domain-containing protein	Fasciclin domain	NO	-/-	NO	NO
contig_32290-LS region	g6891	hypothetical protein	Nitronate monooxygenase	NO	-/-	NO	NO
contig_32290-LS region	g6892	Ctf1	Fungal specific transcription factor domain	NO	-/-	NO	NO
contig_32290-LS region	g6893	hypothetical protein	Enoyl-CoA hydratase/isomerase	NO	-/-	NO	NO
contig_32290-LS region	g6894	Aldehyde dehydrogenase	Aldehyde dehydrogenase family;short chain dehydrogenase	NO	-/-	NO	NO
contig_32290-LS region	g6895	Carboxypeptidase	Serine carboxypeptidase	Signal peptide/0.9963	-/-	NO	NO
contig_32290-LS region	g6896	hypothetical protein	-	NO	-/-	NO	NO
contig_32290-LS region	g6897	MFS domain-containing protein	Major Facilitator Superfamily	NO	-/-	NO	NO
contig_32290-LS region	g6898	Abhydrolase_3 domain-containing protein	alpha/beta hydrolase fold	NO	-/-	NO	NO
contig_32290-LS region	g6899	FAD-binding PCMH-type domain-containing protein	FAD binding domain;Berberine and berberine like	NO	-/-	NO	NO
contig_32290-LS region	g6900	hypothetical protein	Cytochrome P450	Signal peptide/0.8843	-/-	NO	NO
contig_32290-LS region	g6901	Fungal_trans domain-containing protein	Fungal specific transcription factor domain	NO	-/-	NO	NO
contig_32290-LS region	g6902	Related to flavin-containing monooxygenase	Pyridine nucleotide-disulphide oxidoreductase	NO	-/-	NO	NO
contig_32290-LS region	g6903	MFS transporter, SP family, general alpha glucoside:H+ symporter	Sugar (and other) transporter	NO	-/-	NO	NO
contig_32290-LS region	g6904	Beta-glucosidase	PA14 domain;Glycosyl hydrolase family 3 N terminal domain;Glycosyl hydrolase family 3 C-terminal domain	NO	-/-	NO	GH3
contig_32290-LS region	g6905	Serine/threonine kinase 16	Major Facilitator Superfamily	NO	-/-	NO	NO
contig_32290-LS region	g6906	L-pipecolate oxidase	FAD dependent oxidoreductase	NO	-/-	NO	NO
contig_32290-LS region	g6907	hypothetical protein	-	Signal peptide/0.9883	-/Y (0.5)	Apoplastic effector	NO
contig_32290-LS region	g6908	hypothetical protein	Protein of unknown function (DUF1593)	Signal peptide/0.9383	-/-	NO	NO
contig_32290-LS region	g6909	hypothetical protein	Survival protein SurE	Signal peptide/0.9965	-/-	NO	NO
contig_32290-LS region	g6910	hypothetical protein	-	NO	-/-	NO	NO
contig_32290-LS region	g6911	MHYT domain-containing protein	Bacterial signalling protein N terminal repeat	NO	-/-	NO	NO
contig_32290-LS region	g6912	Calcium-transporting ATPase	Cation transporter/ATPase, N-terminus;haloacid dehalogenase-like hydrolase;E1-E2 ATPase;Cation transporting ATPase, C-terminus	NO	-/-	NO	NO
contig_32290-LS region	g6913	C6 transcription factor	-	NO	-/-	NO	NO
contig_32290-LS region	g6914	Transmembrane amino acid transporter protein	Transmembrane amino acid transporter protein	NO	-/-	NO	NO
contig_32290-LS region	g6915	Related to P.aeruginosa anthranilate synthase component II	Glutamine amidotransferase class-I	NO	-/-	NO	NO
contig_32322-LS region	g6916	hypothetical protein	-	NO	-/-	NO	NO
contig_32322-LS region	g6917	HNHc domain-containing protein	HNH endonuclease	NO	-/-	NO	NO
contig_32322-LS region	g6918	WD_REPEATS_REGION domain-containing protein	-	NO	-/-	NO	NO
contig_32322-LS region	g6919	Chitinase	Glycosyl hydrolases family 18;Chitin recognition protein;Glycosyl hydrolases family 18	Signal peptide/0.9999	-/-	NO	CBM18;GH18
contig_32322-LS region	g6920	hypothetical protein	LysM domain	Signal peptide/0.9603	-/-	NO	NO
contig_32322-LS region	g6921	hypothetical protein	-	Signal peptide/0.9616	-/-	NO	CBM50
contig_32322-LS region	g6922	hypothetical protein	-	NO	-/-	NO	NO
contig_32322-LS region	g6923	hypothetical protein	-	NO	-/-	NO	NO
contig_32322-LS region	g6924	Atypical serine/threonine protein kinase BUD32	-	NO	-/-	NO	NO
contig_32322-LS region	g6925	SGNH_hydro domain-containing protein	GDSL-like Lipase/Acylhydrolase family	NO	-/-	NO	NO
contig_32322-LS region	g6926	hypothetical protein	Domain of unknown function (DUF4982);Glycoside hydrolase family 2 C-terminal domain 5;Glycosyl hydrolases family 2, TIM barrel domain;Glycosyl hydrolases family 2;Glycosyl hydrolases family 2, sugar binding domain	Signal peptide/0.9934	-/-	NO	GH2
contig_32322-LS region	g6927	hypothetical protein	short chain dehydrogenase	NO	-/-	NO	NO
contig_32322-LS region	g6928	Aa_trans domain-containing protein	Transmembrane amino acid transporter protein	NO	-/-	NO	NO
contig_32322-LS region	g6929	hypothetical protein	HPP family	NO	-/-	NO	NO
contig_32322-LS region	g6930	Related to transcriptional activator acu-15	Fungal specific transcription factor domain	NO	-/-	NO	NO
contig_32322-LS region	g6931	hypothetical protein	Bacteriorhodopsin-like protein	NO	-/-	NO	NO
contig_32322-LS region	g6932	Beta-xylosidase	-	Signal peptide/0.987	-/-	NO	NO
contig_32322-LS region	g6933	hypothetical protein	-	NO	-/-	NO	NO
contig_32322-LS region	g6934	L-ornithine N(5)-monooxygenase	-	NO	-/-	NO	NO
contig_32322-LS region	g6935	Zn(2)-C6 fungal-type domain-containing protein	Fungal specific transcription factor domain;Fungal Zn(2)-Cys(6) binuclear cluster domain	NO	-/-	NO	NO
contig_32322-LS region	g6936	Alpha-galactosidase C	-	NO	-/-	NO	NO
contig_32322-LS region	g6937	MFS domain-containing protein	Sugar (and other) transporter	NO	-/-	NO	NO
contig_32322-LS region	g6938	Beta-galactosidase extracellular	Beta-galactosidase, domain 2;Beta-galactosidase jelly roll domain;Beta-galactosidase, domain 3	NO	-/-	NO	GH35
contig_32322-LS region	g6939	MFS domain-containing protein	Sugar (and other) transporter	NO	-/-	NO	NO
contig_32322-LS region	g6940	Beta-glucosidase	Glycosyl hydrolase family 3 C-terminal domain;Glycosyl hydrolase family 3 N terminal domain	NO	-/-	NO	GH3
contig_32322-LS region	g6941	Gag protein	Retrotransposon gag protein	NO	-/-	NO	NO
contig_32322-LS region	g6942	Reverse transcriptase	Reverse transcriptase (RNA-dependent DNA polymerase);RNase H-like domain found in reverse transcriptase	NO	-/-	NO	NO
contig_32322-LS region	g6943	hypothetical protein	-	NO	-/-	NO	NO
contig_32322-LS region	g6944	hypothetical protein	-	NO	-/-	NO	NO
contig_32322-LS region	g6945	hypothetical protein	-	NO	-/-	NO	NO
contig_32322-LS region	g6946	hypothetical protein	-	NO	-/-	NO	NO
contig_32352-LS region	g14630	PKS_ER domain-containing protein	Zinc-binding dehydrogenase;N-terminal domain of oxidoreductase	NO	-/-	NO	GH36
contig_32352-LS region	g14631	Dihydroflavonol-4-reductase	NAD dependent epimerase/dehydratase family	NO	-/-	NO	NO
contig_32352-LS region	g14632	Abhydrolase_3 domain-containing protein	alpha/beta hydrolase fold	NO	-/-	NO	NO
contig_32352-LS region	g14633	Gag protein	Retrotransposon gag protein	NO	-/-	NO	NO
contig_32352-LS region	g14634	Reverse transcriptase	RNase H-like domain found in reverse transcriptase;Reverse transcriptase (RNA-dependent DNA polymerase)	NO	-/-	NO	NO
contig_32352-LS region	g14635	hypothetical protein	-	NO	-/-	NO	NO
contig_32352-LS region	g14636	Polysaccharide lyase family 1	Pectate lyase	Signal peptide/0.9981	-/-	NO	PL1_7
contig_32352-LS region	g14637	hypothetical protein	-	Signal peptide/0.9957	-/-	NO	GH43_22
contig_32352-LS region	g14638	Beta-galactosidase	Beta-galactosidase, domain 3;Beta-galactosidase, domain 2;Beta-galactosidase jelly roll domain;Glycosyl hydrolases family 35	Signal peptide/0.9501	-/-	NO	GH35
contig_32352-LS region	g14639	hypothetical protein	-	NO	-/-	NO	NO
contig_32436-LS region	g13758	Carboxylic ester hydrolase	Tannase and feruloyl esterase	Signal peptide/0.6407	-/-	NO	NO
contig_32436-LS region	g13759	Related to acetoacetyl-CoA synthetase	AMP-binding enzyme C-terminal domain	NO	-/-	NO	NO
contig_32436-LS region	g13760	Zn(2)-C6 fungal-type domain-containing protein	Fungal specific transcription factor domain	NO	-/-	NO	NO
contig_32436-LS region	g13761	FAD_binding_3 domain-containing protein	FAD binding domain	NO	-/-	NO	NO
contig_32436-LS region	g13762	Probable cutinase transcription factor 1 beta	Fungal specific transcription factor domain	NO	-/-	NO	NO
contig_32436-LS region	g13763	Related to permease of the major facilitator superfamily	Major Facilitator Superfamily	NO	-/-	NO	NO
contig_32436-LS region	g13764	hypothetical protein	Cytochrome P450	NO	-/-	NO	NO
contig_32436-LS region	g13765	hypothetical protein	short chain dehydrogenase	NO	-/-	NO	NO
contig_32436-LS region	g13766	Abhydrolase_3 domain-containing protein	alpha/beta hydrolase fold	NO	-/-	NO	NO
contig_32436-LS region	g13767	hypothetical protein	Flavin-binding monooxygenase-like	NO	-/-	NO	NO
contig_32436-LS region	g13768	6-phosphogluconate dehydrogenase, decarboxylating	NAD binding domain of 6-phosphogluconate dehydrogenase;6-phosphogluconate dehydrogenase, C-terminal domain	NO	-/-	NO	NO
contig_32436-LS region	g13769	MFS domain-containing protein	Major Facilitator Superfamily	NO	-/-	NO	NO
contig_32436-LS region	g13770	alpha-1,2-Mannosidase	Fungal specific transcription factor domain	NO	-/-	NO	NO
contig_32436-LS region	g13771	Related to glu/asp-tRNA amidotransferase subunit A	Amidase	NO	-/-	NO	NO
contig_32436-LS region	g13772	Transferase	Phosphotransferase enzyme family	NO	-/-	NO	NO
contig_32436-LS region	g13773	Peptide hydrolase	PA domain;Peptidase family M28	Signal peptide/0.9124	-/-	NO	NO
contig_32436-LS region	g13774	hypothetical protein	Glyoxalase/Bleomycin resistance protein/Dioxygenase superfamily	NO	-/-	NO	NO
contig_32436-LS region	g13775	MFS domain-containing protein	Major Facilitator Superfamily	NO	-/-	NO	NO
contig_32436-LS region	g13776	hypothetical protein	-	NO	-/-	NO	NO
contig_32436-LS region	g13777	FAD-binding PCMH-type domain-containing protein	FAD binding domain	NO	-/-	NO	NO
contig_32436-LS region	g13778	MFS domain-containing protein	Major Facilitator Superfamily	NO	-/-	NO	NO
contig_32436-LS region	g13779	hypothetical protein	-	NO	-/-	NO	NO
contig_32436-LS region	g13780	hypothetical protein	-	NO	-/-	NO	NO
contig_32312-LS region	g11376	Cytochrome P450 monooygenase 1	Cytochrome P450	NO	-/-	NO	NO
contig_32312-LS region	g11377	Ent-kaurene oxidase P450-4	Cytochrome P450	NO	-/-	NO	NO
contig_32312-LS region	g11378	Cytochrome P450 monooygenase 2	Cytochrome P450	NO	-/-	NO	NO
contig_32312-LS region	g11379	hypothetical protein	-	NO	-/-	NO	NO
contig_32312-LS region	g11380	Related to SKI2-antiviral protein and putative helicase	-	NO	-/-	NO	NO
contig_32312-LS region	g11381	HNHc domain-containing protein	HNH endonuclease	NO	-/-	NO	NO
contig_32312-LS region	g11382	TPR_REGION domain-containing protein	Tetratricopeptide repeat;Tetratricopeptide repeat;Tetratricopeptide repeat;NB-ARC domain	NO	-/-	NO	NO
contig_32312-LS region	g11383	hypothetical protein	-	NO	-/-	NO	NO
contig_32312-LS region	g11384	DDE_Tnp_1_7 domain-containing protein	Transposase IS4	NO	-/-	NO	NO
contig_32312-LS region	g11385	hypothetical protein	-	NO	-/-	NO	NO
contig_32312-LS region	g11386	hypothetical protein	-	NO	-/-	NO	NO
contig_32312-LS region	g11387	Helitron_like_N domain-containing protein	-	NO	-/-	NO	NO
contig_32312-LS region	g11388	DDE_Tnp_1_7 domain-containing protein	Transposase IS4	NO	-/-	NO	NO
contig_32312-LS region	g11389	APH domain-containing protein	Phosphotransferase enzyme family	NO	-/-	NO	NO
contig_32312-LS region	g11390	hypothetical protein	-	NO	-/-	NO	NO
contig_32312-LS region	g11391	Chitinase	-	NO	-/-	NO	NO
contig_32312-LS region	g11392	hypothetical protein	-	NO	-/-	NO	NO
contig_32312-LS region	g11393	hypothetical protein	-	NO	-/-	NO	NO
contig_32440-LS region	g10637	Sulfatase domain-containing protein	Sulfatase	NO	-/-	NO	NO
contig_32440-LS region	g10638	hypothetical protein	-	NO	-/-	NO	NO
contig_32440-LS region	g10639	hypothetical protein	-	NO	-/-	NO	NO
contig_32440-LS region	g10640	hypothetical protein	Transmembrane amino acid transporter protein	NO	-/-	NO	NO
contig_32440-LS region	g10641	TM2 domain-containing protein	TM2 domain	NO	-/-	NO	NO
contig_32440-LS region	g10642	Hydroxymethylglutaryl-CoA reductase	Hydroxymethylglutaryl-coenzyme A reductase	NO	-/-	NO	NO
contig_32440-LS region	g10643	hypothetical protein	-	NO	-/-	NO	NO
contig_32440-LS region	g10644	hypothetical protein	-	NO	-/-	NO	NO
contig_32440-LS region	g10645	hypothetical protein	-	NO	-/-	NO	NO
contig_32440-LS region	g10646	Related to retrotransposon HobS hobase	Reverse transcriptase (RNA-dependent DNA polymerase)	NO	-/-	NO	NO
contig_32440-LS region	g10647	hypothetical protein	-	NO	-/-	NO	NO
contig_32440-LS region	g10648	VWFA domain-containing protein	-	NO	-/-	NO	NO
contig_32440-LS region	g10649	hypothetical protein	-	NO	-/-	NO	NO
contig_32440-LS region	g10650	hypothetical protein	-	NO	-/-	NO	NO
contig_32440-LS region	g10651	EST1_DNA_bind domain-containing protein	Est1 DNA/RNA binding domain	NO	-/-	NO	NO
contig_32440-LS region	g10652	hypothetical protein	-	NO	-/-	NO	NO
contig_32440-LS region	g10653	hypothetical protein	-	NO	-/-	NO	NO
contig_32396-LS region	g14567	hypothetical protein	RNase H-like domain found in reverse transcriptase;Reverse transcriptase (RNA-dependent DNA polymerase)	NO	-/-	NO	NO
contig_32396-LS region	g14568	Gag protein	Retrotransposon gag protein	NO	-/-	NO	NO
contig_32396-LS region	g14569	Pectate lyase	Pectate lyase	Signal peptide/0.9728	-/-	NO	PL3_2
contig_32396-LS region	g14570	DUF953 domain-containing protein	Eukaryotic protein of unknown function (DUF953)	NO	-/-	NO	NO
contig_32396-LS region	g14571	hypothetical protein	-	NO	-/-	NO	NO
contig_32396-LS region	g14572	Long-chain-alcohol oxidase	GMC oxidoreductase;GMC oxidoreductase	NO	-/-	NO	AA0
contig_32396-LS region	g14573	hypothetical protein	ABC-2 type transporter;CDR ABC transporter;ABC-2 type transporter;ABC transporter	NO	-/-	NO	NO
contig_32396-LS region	g14574	L-ornithine N(5)-monooxygenase	short chain dehydrogenase;Flavin-binding monooxygenase-like	NO	-/-	NO	NO
contig_32396-LS region	g14575	hypothetical protein	Cytochrome P450	NO	-/-	NO	NO
contig_32396-LS region	g14576	hypothetical protein	-	Signal peptide/0.86	-/-	NO	NO
contig_32396-LS region	g14577	hypothetical protein	Transmembrane amino acid transporter protein	NO	-/-	NO	NO
contig_32396-LS region	g14578	hypothetical protein	Amino acid permease	NO	-/-	NO	NO
contig_32396-LS region	g14579	hypothetical protein	-	NO	-/-	NO	NO
contig_32396-LS region	g14580	hypothetical protein	FAD-binding domain;Ferric reductase like transmembrane component;Ferric reductase NAD binding domain	NO	-/-	NO	NO
contig_32396-LS region	g14581	hypothetical protein	Oxidoreductase family, NAD-binding Rossmann fold;Oxidoreductase family, C-terminal alpha/beta domain	NO	-/-	NO	NO
contig_32396-LS region	g14582	NAD(P)-bd_dom domain-containing protein	NAD(P)H-binding	NO	-/-	NO	NO
contig_32396-LS region	g14583	hypothetical protein	-	NO	-/-	NO	NO
contig_32396-LS region	g14584	Chitinase	Glycosyl hydrolases family 18	Signal peptide/0.9698	-/-	NO	CBM18;GH18
contig_32396-LS region	g14585	Non-reducing end alpha-L-arabinofuranosidase	Alpha-L-arabinofuranosidase C-terminal domain	Signal peptide/0.9113	-/-	NO	GH51
contig_32396-LS region	g14586	MFS domain-containing protein	Sugar (and other) transporter	NO	-/-	NO	NO
contig_32396-LS region	g14587	Amidohydro-rel domain-containing protein	Amidohydrolase	Signal peptide/0.9345	-/-	NO	NO
contig_32396-LS region	g14588	Gag protein	Retrotransposon gag protein	NO	-/-	NO	NO
contig_32396-LS region	g14589	Pol polyprotein	Reverse transcriptase (RNA-dependent DNA polymerase);RNase H-like domain found in reverse transcriptase	NO	-/-	NO	NO
contig_32394-LS region	g14545	hypothetical protein	-	NO	-/-	NO	NO
contig_32394-LS region	g14546	hypothetical protein	-	NO	-/-	NO	NO
contig_32394-LS region	g14547	F-box domain-containing protein	-	NO	-/-	NO	NO
contig_32394-LS region	g14548	hypothetical protein	Orsellinic acid/F9775 biosynthesis cluster protein D	NO	-/-	NO	NO
contig_32394-LS region	g14549	Tlh3	-	NO	-/-	NO	NO
contig_32394-LS region	g14550	Cyclin N-terminal domain-containing protein	Cyclin, C-terminal domain;Cyclin, N-terminal domain	NO	-/-	NO	NO
contig_32394-LS region	g14551	hypothetical protein	Amidase	NO	-/-	NO	NO
contig_32394-LS region	g14552	Vacuolar calcium ion transporter	Sodium/calcium exchanger protein	NO	-/-	NO	NO
contig_32394-LS region	g14553	Hypothetical protein	Chitin recognition protein;Glycosyl hydrolases family 18	Signal peptide/0.9946	-/-	NO	CBM18;GH18
contig_32394-LS region	g14554	hypothetical protein	-	NO	-/-	NO	NO
contig_32394-LS region	g14555	Reverse transcriptase	-	NO	-/-	NO	NO
contig_32394-LS region	g14556	DDE Tnp4 domain-containing protein	DDE superfamily endonuclease	NO	-/-	NO	NO
contig_32394-LS region	g14557	hypothetical protein	Calpain family cysteine protease	NO	-/-	NO	NO
contig_32394-LS region	g14558	DDE_Tnp_1_7 domain-containing protein	NACHT domain;Transposase IS4	NO	-/-	NO	NO
contig_32394-LS region	g14559	hypothetical protein	-	NO	-/-	NO	NO
contig_32394-LS region	g14560	JmjC domain-containing protein	-	NO	-/-	NO	NO
contig_32394-LS region	g14561	hypothetical protein	-	NO	-/-	NO	NO
contig_32394-LS region	g14562	Related to transposase	DDE superfamily endonuclease;Tc5 transposase DNA-binding domain;helix-turn-helix, Psq domain	NO	-/-	NO	NO
contig_32394-LS region	g14563	hypothetical protein	Amidase	NO	-/-	NO	NO
contig_32394-LS region	g14564	AAA domain-containing protein	ATPase family associated with various cellular activities (AAA)	NO	-/-	NO	NO
contig_32394-LS region	g14565	hypothetical protein	-	NO	-/-	NO	NO
contig_32394-LS region	g14566	hypothetical protein	-	NO	-/-	NO	NO
contig_32390-LS region	g1963	DDE_Tnp_1_7 domain-containing protein	Transposase IS4	NO	-/-	NO	NO
contig_32390-LS region	g1964	Atypical serine/threonine protein kinase BUD32	Protein tyrosine and serine/threonine kinase	NO	-/-	NO	NO
contig_32390-LS region	g1965	hypothetical protein	Cyclin, C-terminal domain;Cyclin, N-terminal domain	NO	-/-	NO	NO
contig_32390-LS region	g1966	Beta_elim_lyase domain-containing protein	Beta-eliminating lyase	NO	-/-	NO	NO
contig_32390-LS region	g1967	AB hydrolase-1 domain-containing protein	alpha/beta hydrolase fold	NO	-/-	NO	NO
contig_32390-LS region	g1968	hypothetical protein	-	NO	-/-	NO	NO
contig_32390-LS region	g1969	PKS_ER domain-containing protein	Zinc-binding dehydrogenase;Alcohol dehydrogenase GroES-like domain	NO	-/-	NO	NO
contig_32390-LS region	g1970	Beta_elim_lyase domain-containing protein	Beta-eliminating lyase	NO	-/-	NO	NO
contig_32390-LS region	g1971	ANK_REP_REGION domain-containing protein	Ankyrin repeats (3 copies)	NO	-/-	NO	NO
contig_32390-LS region	g1972	Sulfatase domain-containing protein	Sulfatase	NO	-/-	NO	NO
contig_32390-LS region	g1973	hypothetical protein	-	NO	-/-	NO	NO
contig_32482-LS region	g6682	hypothetical protein	-	NO	-/-	NO	NO
contig_32482-LS region	g6683	hypothetical protein	-	NO	-/-	NO	NO
contig_32482-LS region	g6684	hypothetical protein	-	NO	-/-	NO	NO
contig_32482-LS region	g6685	Beta-hexosaminidase	beta-acetyl hexosaminidase like;Glycosyl hydrolase family 20, catalytic domain	NO	-/-	NO	NO
contig_32482-LS region	g6686	FMN hydroxy acid dehydrogenase domain-containing protein	FMN-dependent dehydrogenase	NO	-/-	NO	NO
contig_32482-LS region	g6687	Zn(2)-C6 fungal-type domain-containing protein	-	NO	-/-	NO	NO
contig_32482-LS region	g6688	MFS domain-containing protein	Major Facilitator Superfamily	NO	-/-	NO	NO
contig_32482-LS region	g6689	CN hydrolase domain-containing protein	Carbon-nitrogen hydrolase	NO	-/-	NO	NO
contig_32482-LS region	g6690	Epimerase domain-containing protein	NAD dependent epimerase/dehydratase family	NO	-/-	NO	NO
contig_32458-LS region	g13781	Pol polyprotein	RNase H-like domain found in reverse transcriptase	NO	-/-	NO	NO
contig_32458-LS region	g13782	Gag protein	Retrotransposon gag protein	NO	-/-	NO	NO
contig_32458-LS region	g13783	hypothetical protein	-	NO	-/-	NO	NO
contig_32458-LS region	g13784	hypothetical protein	-	NO	-/-	NO	NO
contig_32458-LS region	g13785	Related to GDSL Lipase/Acylhydrolase family protein	GDSL-like Lipase/Acylhydrolase family	NO	-/-	NO	NO
contig_32458-LS region	g13786	MFS domain-containing protein	Sugar (and other) transporter	NO	-/-	NO	NO
contig_32458-LS region	g13787	hypothetical protein	7 transmembrane receptor (rhodopsin family)	NO	-/-	NO	NO
contig_32458-LS region	g13788	hypothetical protein	-	NO	-/-	NO	NO
contig_32458-LS region	g13789	Chitinase	LysM domain;Glycosyl hydrolases family 18	NO	-/-	NO	CBM18;CBM24;CBM50;GH18
contig_32458-LS region	g13790	hypothetical protein	-	NO	-/-	NO	NO
contig_32458-LS region	g13791	hypothetical protein	-	NO	-/-	NO	NO
contig_32366-LS region	g6406	hypothetical protein	-	Signal peptide/0.8974	-/Y (0.563)	Apoplastic effector	NO
contig_32366-LS region	g6407	hypothetical protein	-	NO	-/-	NO	NO
contig_32366-LS region	g6408	hypothetical protein	-	NO	-/-	NO	NO
contig_32366-LS region	g6409	Helicase ATP-binding domain-containing protein	-	NO	-/-	NO	NO
contig_32366-LS region	g6410	Tlh3	Orsellinic acid/F9775 biosynthesis cluster protein D;Helicase conserved C-terminal domain;DEAD/DEAH box helicase	NO	-/-	NO	NO
contig_32346-LS region	g4144	Sulfatase domain-containing protein	Sulfatase	NO	-/-	NO	NO
contig_32346-LS region	g4145	ANK_REP_REGION domain-containing protein	Ankyrin repeats (3 copies)	NO	-/-	NO	NO
contig_32346-LS region	g4146	Beta_elim_lyase domain-containing protein	Beta-eliminating lyase	NO	-/-	NO	NO
contig_32346-LS region	g4147	Putative transposase	DDE superfamily endonuclease	NO	-/-	NO	NO
contig_32346-LS region	g4148	Related to isotrichodermin C-15 hydroxylase	Cytochrome P450	NO	-/-	NO	NO
contig_32346-LS region	g4149	Putative small s protein	-	NO	-/-	NO	NO
contig_32346-LS region	g4150	hypothetical protein	-	NO	-/-	NO	NO
contig_32346-LS region	g4151	hypothetical protein	-	NO	-/-	NO	NO
contig_32346-LS region	g4152	ANK_REP_REGION domain-containing protein	-	NO	-/-	NO	NO
contig_32346-LS region	g4153	hypothetical protein	Calpain family cysteine protease	NO	-/-	NO	NO
contig_32346-LS region	g4154	Chitinase	Glycosyl hydrolases family 18	NO	-/-	NO	GH18
contig_32346-LS region	g4155	hypothetical protein	Cytosolic domain of 10TM putative phosphate transporter;Calcium-dependent channel, 7TM region, putative phosphate	NO	-/-	NO	NO
contig_32346-LS region	g4156	hypothetical protein	-	NO	-/-	NO	NO
contig_32346-LS region	g4157	hypothetical protein	-	NO	-/-	NO	NO
contig_32346-LS region	g4158	BZIP domain-containing protein	-	NO	-/-	NO	NO
contig_32346-LS region	g4159	hypothetical protein	-	NO	-/-	NO	NO
contig_32346-LS region	g4160	Vacuolar calcium ion transporter	Sodium/calcium exchanger protein	NO	-/-	NO	GH81
contig_32346-LS region	g4161	Transposase	DDE superfamily endonuclease	NO	-/-	NO	NO
contig_32346-LS region	g4162	hypothetical protein	-	NO	-/-	NO	NO
contig_32346-LS region	g4163	hypothetical protein	Calpain family cysteine protease	NO	-/-	NO	NO
contig_32346-LS region	g4164	hypothetical protein	Middle or third domain of peptidase_M16;Insulinase (Peptidase family M16);Peptidase M16 inactive domain	NO	-/-	NO	NO
contig_32346-LS region	g4165	Clr5 domain-containing protein	Clr5 domain	NO	-/-	NO	NO
contig_32324-LS region	g6744	hypothetical protein	-	NO	-/-	NO	NO
contig_32324-LS region	g6745	JmjC domain-containing protein	JmjC domain, hydroxylase	NO	-/-	NO	NO
contig_32324-LS region	g6746	hypothetical protein	-	NO	-/-	NO	NO
contig_32324-LS region	g6747	hypothetical protein	-	NO	-/-	NO	NO
contig_32324-LS region	g6748	hypothetical protein	-	NO	-/-	NO	NO
contig_32324-LS region	g6749	BTB domain-containing protein	BTB/POZ domain	NO	-/-	NO	NO
contig_32324-LS region	g6750	hypothetical protein	-	NO	-/-	NO	NO
contig_32324-LS region	g6751	hypothetical protein	-	NO	-/-	NO	NO
contig_32324-LS region	g6752	JmjC domain-containing protein	-	NO	-/-	NO	NO
contig_32324-LS region	g6753	hypothetical protein	-	NO	-/-	NO	NO
contig_32324-LS region	g6754	hypothetical protein	-	Signal peptide/0.5364	Y (0.812)/-	Cytoplasmic effector	NO
contig_32324-LS region	g6755	hypothetical protein	-	NO	-/-	NO	NO
contig_32324-LS region	g6756	hypothetical protein	-	NO	-/-	NO	NO
contig_32324-LS region	g6757	JmjC domain-containing protein	JmjC domain, hydroxylase	NO	-/-	NO	NO
contig_32324-LS region	g6758	hypothetical protein	-	NO	-/-	NO	NO
contig_32324-LS region	g6759	hypothetical protein	-	NO	-/-	NO	NO
contig_32324-LS region	g6760	Helicase domain protein	-	NO	-/-	NO	NO
contig_32324-LS region	g6761	SNF2 family N-terminal domain protein	-	NO	-/-	NO	NO
contig_32324-LS region	g6762	hypothetical protein	-	NO	-/-	NO	NO
contig_32324-LS region	g6763	JmjC domain-containing protein	JmjC domain, hydroxylase	NO	-/-	NO	NO
contig_32324-LS region	g6764	hypothetical protein	-	NO	-/-	NO	NO
contig_32324-LS region	g6765	hypothetical protein	Calcium-dependent channel, 7TM region, putative phosphate	NO	-/-	NO	NO
contig_32324-LS region	g6766	Chromo domain-containing protein	Chromo (CHRromatin Organisation MOdifier) domain	NO	-/-	NO	NO
contig_32324-LS region	g6767	DDE_3 domain-containing protein	DDE superfamily endonuclease;Winged helix-turn helix	NO	-/-	NO	NO
contig_32324-LS region	g6768	hypothetical protein	-	NO	-/-	NO	NO
contig_32324-LS region	g6769	hypothetical protein	-	NO	-/-	NO	NO
contig_32324-LS region	g6770	hypothetical protein	-	NO	-/-	NO	NO
contig_32324-LS region	g6771	hypothetical protein	-	NO	-/-	NO	NO
contig_32324-LS region	g6772	hypothetical protein	Fungal specific transcription factor domain	NO	-/-	NO	NO
contig_32324-LS region	g6773	hypothetical protein	-	NO	-/-	NO	NO
contig_32294-LS region	g9167	hypothetical protein	-	NO	-/-	NO	NO
contig_32294-LS region	g9168	hypothetical protein	-	NO	-/-	NO	NO
contig_32294-LS region	g9169	hypothetical protein	-	NO	-/-	NO	NO
contig_32294-LS region	g9170	hypothetical protein	Ankyrin repeats (3 copies)	NO	-/-	NO	NO
contig_32294-LS region	g9171	hypothetical protein	NACHT domain	NO	-/-	NO	NO
contig_32294-LS region	g9172	Endonuclease/exonuclease/phosphatase	-	NO	-/-	NO	NO
contig_32294-LS region	g9173	Putative nacht and ankyrin domain protein	NACHT domain;Ankyrin repeat;Ankyrin repeats (3 copies);Ankyrin repeats (many copies)	NO	-/-	NO	NO
contig_32280-LS region	g10881	hypothetical protein	-	NO	-/-	NO	NO
contig_32280-LS region	g10882	Alcohol dehydrogenase GroES-like domain-containing protein	-	NO	-/-	NO	NO
contig_32280-LS region	g10883	Hard-surface induced protein 5	-	NO	-/-	NO	NO
contig_32280-LS region	g10884	DDE_Tnp_1_7 domain-containing protein	Transposase IS4	NO	-/-	NO	NO
contig_32280-LS region	g10885	hypothetical protein	Cytochrome P450	NO	-/-	NO	NO
contig_32280-LS region	g10886	hypothetical protein	Beta-ketoacyl synthase, C-terminal domain;Methyltransferase domain;Male sterility protein;Ketoacyl-synthetase C-terminal extension;Beta-ketoacyl synthase, N-terminal domain;KR domain;Acyl transferase domain;Polyketide synthase dehydratase;AMP-binding enzyme;Condensation domain;Phosphopantetheine attachment site	NO	-/-	NO	NO
contig_32280-LS region	g10887	hypothetical protein	-	NO	-/-	NO	NO
contig_32280-LS region	g10888	Putative gag-pol poly protein	Reverse transcriptase (RNA-dependent DNA polymerase);RNase H-like domain found in reverse transcriptase	NO	-/-	NO	NO
contig_32280-LS region	g10889	hypothetical protein	-	NO	-/-	NO	NO
contig_32280-LS region	g10890	Cytochrome P450 monooygenase 2	Cytochrome P450	NO	-/-	NO	NO
contig_32280-LS region	g10891	Ent-kaurene oxidase P450-4	Cytochrome P450	NO	-/-	NO	NO
contig_32280-LS region	g10892	Cytochrome P450 monooygenase 1	Cytochrome P450	NO	-/-	NO	NO
contig_32280-LS region	g10893	Bifunctional ent-kaurene synthase	-	NO	-/-	NO	NO
contig_32272-LS region	g10830	hypothetical protein	Calpain family cysteine protease	NO	-/-	NO	NO
contig_32272-LS region	g10831	hypothetical protein	Insulinase (Peptidase family M16);Peptidase M16 inactive domain;Middle or third domain of peptidase_M16	NO	-/-	NO	NO
contig_32272-LS region	g10832	Clr5 domain-containing protein	Clr5 domain	NO	-/-	NO	NO
contig_32272-LS region	g10833	hypothetical protein	-	NO	-/-	NO	NO
contig_32272-LS region	g10834	Ybr242w-like protein	HD domain	NO	-/-	NO	NO
contig_32272-LS region	g10835	HD domain-containing protein	HD domain	NO	-/-	NO	NO
contig_32272-LS region	g10836	hypothetical protein	-	NO	-/-	NO	NO
contig_32272-LS region	g10837	hypothetical protein	Myb-like DNA-binding domain	NO	-/-	NO	NO
contig_32272-LS region	g10838	hypothetical protein	-	NO	-/-	NO	NO
contig_32272-LS region	g10839	hypothetical protein	-	NO	-/-	NO	NO
contig_32272-LS region	g10840	hypothetical protein	-	NO	-/-	NO	NO
contig_32272-LS region	g10841	hypothetical protein	-	NO	-/-	NO	NO
contig_32272-LS region	g10842	hypothetical protein	Protein of unknown function (DUF3638);Protein of unknown function (DUF3645)	NO	-/-	NO	NO
contig_32272-LS region	g10843	hypothetical protein	-	NO	-/-	NO	NO
contig_32272-LS region	g10844	HNHc domain-containing protein	HNH endonuclease	NO	-/-	NO	NO
contig_32272-LS region	g10845	MFS hexose transporter	Sugar (and other) transporter	NO	-/-	NO	NO
contig_32272-LS region	g10846	hypothetical protein	-	NO	-/-	NO	NO
contig_32272-LS region	g10847	Putative phosphorylase superfamily protein	Tc5 transposase DNA-binding domain;DDE superfamily endonuclease;Tetratricopeptide repeat;Tetratricopeptide repeat;NB-ARC domain	NO	-/-	NO	NO
contig_32272-LS region	g10848	HNHc domain-containing protein	HNH endonuclease	NO	-/-	NO	NO
contig_32272-LS region	g10849	hypothetical protein	-	NO	-/-	NO	NO
contig_32272-LS region	g10850	Heterokaryon incompatibility	Heterokaryon incompatibility protein (HET)	NO	-/-	NO	NO
contig_32272-LS region	g10851	hypothetical protein	-	NO	-/-	NO	NO
contig_32272-LS region	g10852	hypothetical protein	-	NO	-/-	NO	NO
contig_32272-LS region	g10853	hypothetical protein	Protein kinase domain;Piwi domain	NO	-/-	NO	NO
contig_32272-LS region	g10854	hypothetical protein	HicA toxin of bacterial toxin-antitoxin,	NO	-/-	NO	NO
contig_32272-LS region	g10855	Serine/threonine protein kinase-like protein	-	NO	-/-	NO	NO
contig_32272-LS region	g10856	hypothetical protein	-	NO	-/-	NO	NO
contig_32272-LS region	g10857	Transcription factor jumonji	-	NO	-/-	NO	NO
contig_32272-LS region	g10858	hypothetical protein	-	NO	-/-	NO	NO
contig_32272-LS region	g10859	hypothetical protein	-	NO	-/-	NO	NO
contig_32272-LS region	g10860	hypothetical protein	-	NO	-/-	NO	NO
contig_32272-LS region	g10861	hypothetical protein	-	NO	-/-	NO	NO
contig_32272-LS region	g10862	hypothetical protein	Ergosterol biosynthesis ERG4/ERG24 family	NO	-/-	NO	NO
contig_32272-LS region	g10863	hypothetical protein	-	Signal peptide/0.9606	Y (0.549)/-	Cytoplasmic effector	NO
contig_32272-LS region	g10864	hypothetical protein	-	NO	-/-	NO	NO
contig_32272-LS region	g10865	hypothetical protein	-	NO	-/-	NO	NO
contig_32272-LS region	g10866	ANK_REP_REGION domain-containing protein	NACHT domain;Ankyrin repeats (3 copies);Ankyrin repeat;Ankyrin repeat;Prion-inhibition and propagation	Signal peptide/0.5557	-/-	NO	NO
contig_32272-LS region	g10867	hypothetical protein	-	NO	-/-	NO	NO
contig_32272-LS region	g10868	hypothetical protein	-	NO	-/-	NO	NO
contig_32272-LS region	g10869	hypothetical protein	UvrD-like helicase C-terminal domain;AAA domain	NO	-/-	NO	NO
contig_32272-LS region	g10870	Hypothetical protein	-	NO	-/-	NO	NO
contig_32272-LS region	g10871	FAD-binding PCMH-type domain-containing protein	FAD binding domain	NO	-/-	NO	NO
contig_32272-LS region	g10872	Related to methyltransferase	Methyltransferase domain	NO	-/-	NO	NO
contig_32272-LS region	g10873	Methyltransf_25 domain-containing protein	Methyltransferase domain	NO	-/-	NO	NO
contig_32272-LS region	g10874	Probable retrotransposon HobS hobase	GAG-pre-integrase domain	NO	-/-	NO	NO
contig_32272-LS region	g10875	hypothetical protein	-	NO	-/-	NO	NO
contig_32272-LS region	g10876	hypothetical protein	-	NO	-/-	NO	NO
contig_32272-LS region	g10877	hypothetical protein	-	NO	-/-	NO	NO
contig_32272-LS region	g10878	hypothetical protein	-	NO	-/-	NO	NO
contig_32272-LS region	g10879	hypothetical protein	Orsellinic acid/F9775 biosynthesis cluster protein D	NO	-/-	NO	NO
contig_32272-LS region	g10880	Helicase ATP-binding domain-containing protein	-	NO	-/-	NO	NO
contig_32330-LS region	g6691	SIR2 family histone deacetylase	Sir2 family	NO	-/-	NO	NO
contig_32330-LS region	g6692	hypothetical protein	-	NO	-/-	NO	NO
contig_32330-LS region	g6693	hypothetical protein	-	NO	-/-	NO	NO
contig_32330-LS region	g6694	hypothetical protein	-	NO	-/-	NO	NO
contig_32330-LS region	g6695	hypothetical protein	-	NO	-/-	NO	NO
contig_32330-LS region	g6696	hypothetical protein	-	NO	-/-	NO	NO
contig_32330-LS region	g6697	hypothetical protein	Transposase IS4	NO	-/-	NO	NO
contig_32330-LS region	g6698	C3H1-type domain-containing protein	-	NO	-/-	NO	NO
contig_32330-LS region	g6699	ANK_REP_REGION domain-containing protein	Ankyrin repeats (many copies)	Signal peptide/0.5135	-/-	NO	NO
contig_32330-LS region	g6700	Nudix hydrolase domain-containing protein	NUDIX domain	NO	-/-	NO	NO
contig_32330-LS region	g6701	Dimer_Tnp_hAT domain-containing protein	hAT family C-terminal dimerisation region	NO	-/-	NO	NO
contig_32330-LS region	g6702	hypothetical protein	-	NO	-/-	NO	NO
contig_32330-LS region	g6703	DDE superfamily endonuclease, CENP-B-like protein	DDE superfamily endonuclease	NO	-/-	NO	NO
contig_32330-LS region	g6704	Thiamine-triphosphatase	-	NO	-/-	NO	NO
contig_32330-LS region	g6705	Podospora anserina S mat+ genomic DNA chromosome 7, supercontig 1	Adenylate kinase	NO	-/-	NO	NO
contig_32330-LS region	g6706	Elp3 domain-containing protein	4Fe-4S single cluster domain;Radical SAM superfamily	NO	-/-	NO	NO
contig_32330-LS region	g6707	Chitinase	-	NO	-/-	NO	NO
contig_32330-LS region	g6708	hypothetical protein	-	NO	-/-	NO	NO
contig_32330-LS region	g6709	hypothetical protein	-	NO	-/-	NO	NO
contig_32330-LS region	g6710	hypothetical protein	-	NO	-/-	NO	NO
contig_32330-LS region	g6711	hypothetical protein	-	NO	-/-	NO	NO
contig_32330-LS region	g6712	hypothetical protein	Peptidase M16 inactive domain;Middle or third domain of peptidase_M16;Insulinase (Peptidase family M16)	NO	-/-	NO	NO
contig_32330-LS region	g6713	hypothetical protein	Calpain family cysteine protease	NO	-/-	NO	NO
contig_32330-LS region	g6714	hypothetical protein	Peptidase M16 inactive domain;Insulinase (Peptidase family M16)	NO	-/-	NO	NO
contig_32330-LS region	g6715	hypothetical protein	-	NO	-/-	NO	NO
contig_32330-LS region	g6716	Integrase catalytic domain-containing protein	-	NO	-/-	NO	NO
contig_32330-LS region	g6717	HNHc domain-containing protein	HNH endonuclease	NO	-/-	NO	NO
contig_32330-LS region	g6718	Aa_trans domain-containing protein	Transmembrane amino acid transporter protein	NO	-/-	NO	NO
contig_32330-LS region	g6719	Hypothetical protein	MOSC domain;2Fe-2S iron-sulfur cluster binding domain	NO	-/-	NO	NO
contig_32330-LS region	g6720	hypothetical protein	-	NO	-/-	NO	NO
contig_32330-LS region	g6721	Acetylacetone-cleaving enzyme	ChrR Cupin-like domain	NO	-/-	NO	NO
contig_32330-LS region	g6722	hypothetical protein	-	NO	-/-	NO	NO
contig_32330-LS region	g6723	hypothetical protein	-	NO	-/-	NO	NO
contig_32330-LS region	g6724	hypothetical protein	-	NO	-/-	NO	NO
contig_32330-LS region	g6725	JmjC domain-containing protein	JmjC domain, hydroxylase	NO	-/-	NO	NO
contig_32330-LS region	g6726	Protein kinase subdomain-containing protein	Phosphotransferase enzyme family	NO	-/-	NO	NO
contig_32330-LS region	g6727	hypothetical protein	-	NO	-/-	NO	NO
contig_32330-LS region	g6728	hypothetical protein	RNase H	NO	-/-	NO	NO
contig_32330-LS region	g6729	hypothetical protein	-	NO	-/-	NO	NO
contig_32330-LS region	g6730	Podospora anserina S mat+ genomic DNA chromosome 3, supercontig 2	-	NO	-/-	NO	NO
contig_32330-LS region	g6731	hypothetical protein	-	NO	-/-	NO	NO
contig_32330-LS region	g6732	hypothetical protein	-	NO	-/-	NO	NO
contig_32330-LS region	g6733	ATP-dependent DNA helicase	-	NO	-/-	NO	NO
contig_32330-LS region	g6734	Helitron_like_N domain-containing protein	Helitron helicase-like domain at N-terminus	NO	-/-	NO	NO
contig_32330-LS region	g6735	WD_REPEATS_REGION domain-containing protein	-	NO	-/-	NO	NO
contig_32330-LS region	g6736	hypothetical protein	-	NO	-/-	NO	NO
contig_32330-LS region	g6737	hypothetical protein	-	NO	-/-	NO	NO
contig_32330-LS region	g6738	hypothetical protein	-	NO	-/-	NO	NO
contig_32330-LS region	g6739	DDE_Tnp_1_7 domain-containing protein	Transposase IS4	NO	-/-	NO	NO
contig_32330-LS region	g6740	hypothetical protein	Orsellinic acid/F9775 biosynthesis cluster protein D	NO	-/-	NO	NO
contig_32330-LS region	g6741	hypothetical protein	-	NO	-/-	NO	NO
contig_32330-LS region	g6742	hypothetical protein	-	NO	-/-	NO	NO
contig_32330-LS region	g6743	hypothetical protein	Clr5 domain	NO	-/-	NO	NO
contig_32338-LS region	g13712	hypothetical protein	-	NO	-/-	NO	NO
contig_32338-LS region	g13713	hypothetical protein	-	NO	-/-	NO	NO
contig_32338-LS region	g13714	hypothetical protein	-	NO	-/-	NO	NO
contig_32338-LS region	g13715	hypothetical protein	-	NO	-/-	NO	NO
contig_32338-LS region	g13716	Helicase ATP-binding domain-containing protein	-	NO	-/-	NO	NO
contig_32338-LS region	g13717	Retrotransposon HobS hobase	-	NO	-/-	NO	NO
contig_32338-LS region	g13718	hypothetical protein	-	NO	-/-	NO	NO
contig_32338-LS region	g13719	hypothetical protein	Permease for cytosine/purines, uracil, thiamine, allantoin	NO	-/-	NO	NO
contig_32338-LS region	g13720	Tlh3	DEAD/DEAH box helicase	NO	-/-	NO	NO
contig_32338-LS region	g13721	Helicase ATP-binding domain-containing protein	-	NO	-/-	NO	NO
contig_32338-LS region	g13722	Helicase ATP-binding domain-containing protein	-	NO	-/-	NO	NO
contig_32338-LS region	g13723	ANK_REP_REGION domain-containing protein	Ankyrin repeats (3 copies);NACHT domain;Prion-inhibition and propagation	Signal peptide/0.7511	-/-	NO	NO
contig_32338-LS region	g13724	Tlh3	-	NO	-/-	NO	NO
contig_32338-LS region	g13725	Beta-hexosaminidase	Glycosyl hydrolase family 20, catalytic domain	NO	-/-	NO	NO
contig_32338-LS region	g13726	hypothetical protein	short chain dehydrogenase	NO	-/-	NO	NO
contig_32338-LS region	g13727	hypothetical protein	Bacterial protein of unknown function (DUF899)	NO	-/-	NO	NO
contig_32338-LS region	g13728	hypothetical protein	-	Signal peptide/0.9984	-/-	NO	NO
contig_32338-LS region	g13729	hypothetical protein	-	NO	-/-	NO	NO
contig_32338-LS region	g13730	Non-specific serine/threonine protein kinase	Protein kinase domain	NO	-/-	NO	NO
contig_32338-LS region	g13731	hypothetical protein	-	NO	-/-	NO	NO
contig_32338-LS region	g13732	FAD-binding PCMH-type domain-containing protein	FAD binding domain	Signal peptide/0.8601	-/-	NO	NO
contig_32338-LS region	g13733	hypothetical protein	Cytochrome P450	NO	-/-	NO	NO
contig_32338-LS region	g13734	Related to methyltransferase	Methyltransferase domain	NO	-/-	NO	NO
contig_32338-LS region	g13735	Sugar transporter	Sugar (and other) transporter	NO	-/-	NO	NO
contig_32338-LS region	g13736	Calcium-transporting ATPase	Cation transporter/ATPase, N-terminus	NO	-/-	NO	NO
contig_32338-LS region	g13737	Calcium-transporting ATPase	E1-E2 ATPase;Cation transporting ATPase, C-terminus;haloacid dehalogenase-like hydrolase	NO	-/-	NO	NO
contig_32338-LS region	g13738	2-pyrone-4,6-dicarbaxylate hydrolase	Amidohydrolase	NO	-/-	NO	NO
contig_32338-LS region	g13739	Sugar transporter	Sugar (and other) transporter	NO	-/-	NO	NO
contig_32338-LS region	g13740	Fructose-bisphosphate aldolase	Fructose-bisphosphate aldolase class-II	NO	-/-	NO	NO
contig_32338-LS region	g13741	4-hydroxy-4-methyl-2-oxoglutarate aldolase	Aldolase/RraA	NO	-/-	NO	NO
contig_32338-LS region	g13742	L-sulfolactate dehydrogenase	Malate/L-lactate dehydrogenase	NO	-/-	NO	NO
contig_32338-LS region	g13743	MFS transporter prlL	Major Facilitator Superfamily	NO	-/-	NO	NO
contig_32338-LS region	g13744	ATP-grasp domain-containing protein	D-ala D-ala ligase C-terminus	NO	-/-	NO	NO
contig_32338-LS region	g13745	Stress responsive a b barrel domain protein	Stress responsive A/B Barrel Domain	NO	-/-	NO	NO
contig_32338-LS region	g13746	Similar to Dihydroxyacetone kinase 2 acc. no. O74215	Dak1 domain;DAK2 domain	NO	-/-	NO	NO
contig_32338-LS region	g13747	Putative 3-hydroxyacyl-nad binding protein	-	NO	-/-	NO	NO
contig_32338-LS region	g13748	Related to 3-hydroxybutyryl-CoA dehydrogenase	3-hydroxyacyl-CoA dehydrogenase, NAD binding domain	NO	-/-	NO	NO
contig_32338-LS region	g13749	hypothetical protein	Fungal hydrophobin	Signal peptide/0.9995	Y (0.568)/Y (0.685)	Apoplastic/cytoplasmic effector	NO
contig_32338-LS region	g13750	hypothetical protein	-	Signal peptide/0.9976	-/-	NO	NO
contig_32338-LS region	g13751	hypothetical protein	-	NO	-/-	NO	NO
contig_32338-LS region	g13752	hypothetical protein	Zinc-binding dehydrogenase;Alcohol dehydrogenase GroES-like domain	NO	-/-	NO	NO
contig_32338-LS region	g13753	Lactamase_B domain-containing protein	-	NO	-/-	NO	NO
contig_32338-LS region	g13754	HET domain-containing protein	-	NO	-/-	NO	NO
contig_32338-LS region	g13755	Reverse transcriptase	RNase H-like domain found in reverse transcriptase;Reverse transcriptase (RNA-dependent DNA polymerase);Retrotransposon gag protein	NO	-/-	NO	NO
contig_32338-LS region	g13756	Gag protein	Retrotransposon gag protein	NO	-/-	NO	NO
contig_32338-LS region	g13757	Pol polyprotein	RNase H-like domain found in reverse transcriptase	NO	-/-	NO	NO
contig_32314-LS region	g12844	hypothetical protein	-	NO	-/-	NO	NO
contig_32314-LS region	g12845	hypothetical protein	-	NO	-/-	NO	NO
contig_32314-LS region	g12846	CCHC-type domain-containing protein	DDE superfamily endonuclease	NO	-/-	NO	NO
contig_32314-LS region	g12847	hypothetical protein	-	NO	-/-	NO	NO
contig_32314-LS region	g12848	Reverse transcriptase	-	NO	-/-	NO	NO
contig_32314-LS region	g12849	Reverse transcriptase, putative	-	NO	-/-	NO	NO
contig_32314-LS region	g12850	hypothetical protein	-	NO	-/-	NO	NO
contig_32314-LS region	g12851	ANK_REP_REGION domain-containing protein	Ankyrin repeats (many copies);Ankyrin repeats (many copies);Ankyrin repeats (3 copies);Ankyrin repeat	Signal peptide/0.5359	-/-	NO	NO
contig_32314-LS region	g12852	SNF2 family N-terminal domain protein	-	NO	-/-	NO	NO
contig_32314-LS region	g12853	Helicase domain protein	-	NO	-/-	NO	NO
contig_32314-LS region	g12854	hypothetical protein	-	NO	-/-	NO	NO
contig_32314-LS region	g12855	Reverse transcriptase	-	NO	-/-	NO	NO
contig_32314-LS region	g12856	hypothetical protein	-	NO	-/-	NO	NO
contig_32314-LS region	g12857	hypothetical protein	-	NO	-/-	NO	NO
contig_32314-LS region	g12858	hypothetical protein	Putative amidoligase enzyme	NO	-/-	NO	NO
contig_32314-LS region	g12859	hypothetical protein	-	NO	-/-	NO	NO
contig_32314-LS region	g12860	hypothetical protein	-	NO	-/-	NO	NO
contig_32314-LS region	g12861	hypothetical protein	-	NO	-/-	NO	NO
contig_32314-LS region	g12862	Helicase domain protein	-	NO	-/-	NO	NO
contig_32314-LS region	g12863	SNF2 family N-terminal domain protein	-	NO	-/-	NO	NO
contig_32314-LS region	g12864	hypothetical protein	-	NO	-/-	NO	NO
contig_32314-LS region	g12865	hypothetical protein	-	NO	-/-	NO	NO
contig_32314-LS region	g12866	JmjC domain-containing protein	-	NO	-/-	NO	NO
contig_32314-LS region	g12867	hypothetical protein	-	NO	-/-	NO	NO
contig_32314-LS region	g12868	ANK_REP_REGION domain-containing protein	Ankyrin repeat;Ankyrin repeats (3 copies);Ankyrin repeat	Signal peptide/0.5359	-/-	NO	NO
contig_32314-LS region	g12869	hypothetical protein	-	Signal peptide/0.9848	-/-	NO	NO
contig_32314-LS region	g12870	hypothetical protein	-	NO	-/-	NO	NO
contig_32314-LS region	g12871	WD_REPEATS_REGION domain-containing protein	-	NO	-/-	NO	NO
contig_32314-LS region	g12872	hypothetical protein	-	NO	-/-	NO	NO
contig_32314-LS region	g12873	hypothetical protein	-	NO	-/-	NO	NO
contig_32314-LS region	g12874	hypothetical protein	-	NO	-/-	NO	NO
contig_32314-LS region	g12875	hypothetical protein	-	NO	-/-	NO	NO
contig_32314-LS region	g12876	WD_REPEATS_REGION domain-containing protein	WD domain, G-beta repeat	NO	-/-	NO	NO
contig_32314-LS region	g12877	Hypothetical protein	Chitin recognition protein;Glycosyl hydrolases family 18	NO	-/-	NO	CBM18;GH18
contig_32314-LS region	g12878	Transposase	Tc5 transposase DNA-binding domain;DDE superfamily endonuclease	NO	-/-	NO	NO
contig_32314-LS region	g12879	hypothetical protein	-	NO	-/-	NO	NO
contig_32314-LS region	g12880	Gag/polymerase/env polyprotein, putative	Reverse transcriptase (RNA-dependent DNA polymerase)	NO	-/-	NO	NO
contig_32314-LS region	g12881	hypothetical protein	Glycosyltransferase sugar-binding region containing DXD motif	NO	-/-	NO	NO
contig_32314-LS region	g12882	hypothetical protein	-	NO	-/-	NO	NO
contig_32314-LS region	g12883	EST1_DNA_bind domain-containing protein	-	Signal peptide/0.9384	-/-	NO	NO
contig_32314-LS region	g12884	hypothetical protein	-	NO	-/-	NO	NO
contig_32314-LS region	g12885	hypothetical protein	-	Signal peptide/0.9838	Y (0.884)/Y (0.601)	Cytoplasmic/apoplastic effector	NO
contig_32314-LS region	g12886	hypothetical protein	-	NO	-/-	NO	NO
contig_32314-LS region	g12887	hypothetical protein	-	NO	-/-	NO	NO
contig_32300-LS region	g14590	hypothetical protein	-	NO	-/-	NO	NO
contig_32300-LS region	g14591	hypothetical protein	-	NO	-/-	NO	GT8
contig_32300-LS region	g14592	MFS domain-containing protein	Sugar (and other) transporter;Patatin-like phospholipase	NO	-/-	NO	NO
contig_32300-LS region	g14593	Integral membrane protein	-	NO	-/-	NO	NO
contig_32300-LS region	g14594	hypothetical protein	-	NO	-/-	NO	NO
contig_32300-LS region	g14595	hypothetical protein	-	NO	-/-	NO	NO
contig_32300-LS region	g14596	hypothetical protein	-	NO	-/-	NO	NO
contig_32300-LS region	g14597	Glyco_hydro_cc domain-containing protein	Glycosyl hydrolase catalytic core	NO	-/-	NO	NO
contig_32300-LS region	g14598	EST1_DNA_bind domain-containing protein	Est1 DNA/RNA binding domain	NO	-/-	NO	NO
contig_32300-LS region	g14599	hypothetical protein	-	Signal peptide/0.6819	-/Y (0.87)	Apoplastic effector	NO
contig_32300-LS region	g14600	SIR2 family histone deacetylase	Sir2 family	NO	-/-	NO	NO
contig_32300-LS region	g14601	hypothetical protein	-	NO	-/-	NO	NO
contig_32300-LS region	g14602	Cyclin N-terminal domain-containing protein	Cyclin, N-terminal domain	NO	-/-	NO	NO
contig_32300-LS region	g14603	ATP-dependent DNA helicase	PIF1-like helicase	NO	-/-	NO	NO
contig_32300-LS region	g14604	hypothetical protein	-	NO	-/-	NO	NO
contig_32300-LS region	g14605	JmjC domain-containing protein	JmjC domain, hydroxylase	NO	-/-	NO	NO
contig_32300-LS region	g14606	hypothetical protein	-	NO	-/-	NO	NO
contig_32300-LS region	g14607	hypothetical protein	-	NO	-/-	NO	NO
contig_32300-LS region	g14608	hypothetical protein	-	NO	-/-	NO	NO
contig_32300-LS region	g14609	hypothetical protein	-	NO	-/-	NO	NO
contig_32300-LS region	g14610	EST1_DNA_bind domain-containing protein	Est1 DNA/RNA binding domain	Signal peptide/0.9384	-/-	NO	NO
contig_32300-LS region	g14611	hypothetical protein	-	NO	-/-	NO	NO
contig_32300-LS region	g14612	hypothetical protein	-	NO	-/-	NO	NO
contig_32300-LS region	g14613	hypothetical protein	-	NO	-/-	NO	NO
contig_32300-LS region	g14614	hypothetical protein	JmjC domain, hydroxylase	NO	-/-	NO	NO
contig_32300-LS region	g14615	hypothetical protein	-	NO	-/-	NO	NO
contig_32300-LS region	g14616	JmjC domain-containing protein	JmjC domain, hydroxylase	NO	-/-	NO	NO
contig_32300-LS region	g14617	hypothetical protein	-	NO	-/-	NO	NO
contig_32300-LS region	g14618	hypothetical protein	-	NO	-/-	NO	NO
contig_32300-LS region	g14619	hypothetical protein	-	NO	-/-	NO	NO
contig_32300-LS region	g14620	hypothetical protein	-	NO	-/-	NO	NO
contig_32300-LS region	g14621	hypothetical protein	-	NO	-/-	NO	NO
contig_32300-LS region	g14622	C3H1-type domain-containing protein	-	NO	-/-	NO	NO
contig_32300-LS region	g14623	hypothetical protein	Mannosyltransferase putative	NO	-/-	NO	GT71
contig_32300-LS region	g14624	hypothetical protein	-	NO	-/-	NO	NO
contig_32284-LS region	g6033	hypothetical protein	-	NO	-/-	NO	NO
contig_32284-LS region	g6034	Cytochrome P450 monooygenase 1	Cytochrome P450	NO	-/-	NO	NO
contig_32284-LS region	g6035	Bifunctional ent-kaurene synthase	-	NO	-/-	NO	NO
contig_32284-LS region	g6036	2-oxoglutarate-dependent ethylene/succinate-forming enzyme	non-haem dioxygenase in morphine synthesis N-terminal;2OG-Fe(II) oxygenase superfamily	NO	-/-	NO	NO
contig_32284-LS region	g6037	hypothetical protein	-	NO	-/-	NO	NO
contig_32284-LS region	g6038	JmjC domain-containing protein	JmjC domain, hydroxylase	NO	-/-	NO	NO
contig_32284-LS region	g6039	hypothetical protein	-	NO	-/-	NO	NO
contig_32284-LS region	g6040	hypothetical protein	-	NO	-/-	NO	NO
contig_32284-LS region	g6041	hypothetical protein	-	NO	-/-	NO	NO
contig_32284-LS region	g6042	HET domain-containing protein	Heterokaryon incompatibility protein (HET)	NO	-/-	NO	NO
contig_32284-LS region	g6043	Dimer_Tnp_hAT domain-containing protein	hAT family C-terminal dimerisation region	NO	-/-	NO	NO
contig_32284-LS region	g6044	Nudix hydrolase domain-containing protein	NUDIX domain	NO	-/-	NO	NO
contig_32284-LS region	g6045	hypothetical protein	Transposase IS4	NO	-/-	NO	NO
contig_32284-LS region	g6046	hypothetical protein	-	NO	-/-	NO	NO
contig_32284-LS region	g6047	Hypothetical protein	-	NO	-/-	NO	NO
contig_32284-LS region	g6048	DDE-1 domain-containing protein	DDE superfamily endonuclease	NO	-/-	NO	NO
contig_32284-LS region	g6049	hypothetical protein	Reverse transcriptase (RNA-dependent DNA polymerase);Endonuclease-reverse transcriptase	NO	-/-	NO	NO
contig_32284-LS region	g6050	hypothetical protein	-	NO	-/-	NO	NO
contig_32284-LS region	g6051	Helicase domain protein	-	NO	-/-	NO	NO
contig_32284-LS region	g6052	hypothetical protein	-	NO	-/-	NO	NO
contig_32284-LS region	g6053	hypothetical protein	-	NO	-/-	NO	NO
contig_32284-LS region	g6054	hypothetical protein	-	NO	-/-	NO	NO
contig_32284-LS region	g6055	APH domain-containing protein	Phosphotransferase enzyme family	NO	-/-	NO	NO
contig_32284-LS region	g6056	hypothetical protein	Tc5 transposase DNA-binding domain;SAP domain;DDE superfamily endonuclease	NO	-/-	NO	NO
contig_32284-LS region	g6057	Helitron_like_N domain-containing protein	Helitron helicase-like domain at N-terminus;PIF1-like helicase	NO	-/-	NO	NO
contig_32284-LS region	g6058	hypothetical protein	-	NO	-/-	NO	NO
contig_32284-LS region	g6059	hypothetical protein	-	NO	-/-	NO	NO
contig_32284-LS region	g6060	hypothetical protein	-	NO	-/-	NO	NO
contig_32284-LS region	g6061	Autophagy-related protein	Vacuole effluxer Atg22 like	NO	-/-	NO	NO
contig_32284-LS region	g6062	hypothetical protein	Cytochrome P450	NO	-/-	NO	NO
contig_32284-LS region	g6063	FAA_hydrolase domain-containing protein	Fumarylacetoacetate (FAA) hydrolase family	NO	-/-	NO	NO
contig_32284-LS region	g6064	hypothetical protein	Polyketide cyclase / dehydrase and lipid transport	NO	-/-	NO	NO
contig_32284-LS region	g6065	Probable acyl-CoA dehydrogenase	Acyl-CoA dehydrogenase, N-terminal domain;Acyl-CoA dehydrogenase, middle domain;Acyl-CoA dehydrogenase, C-terminal domain	NO	-/-	NO	NO
contig_32284-LS region	g6066	FAD_binding_3 domain-containing protein	FAD binding domain	NO	-/-	NO	NO
contig_32284-LS region	g6067	Fungal_trans domain-containing protein	-	NO	-/-	NO	NO
contig_32284-LS region	g6068	MFS domain-containing protein	Sugar (and other) transporter	NO	-/-	NO	CE3
contig_32284-LS region	g6069	hypothetical protein	D-isomer specific 2-hydroxyacid dehydrogenase, catalytic domain;D-isomer specific 2-hydroxyacid dehydrogenase, NAD binding domain	NO	-/-	NO	NO
contig_32284-LS region	g6070	hypothetical protein	Major Facilitator Superfamily	NO	-/-	NO	NO
contig_32284-LS region	g6071	Cupin_2 domain-containing protein	-	NO	-/-	NO	NO
contig_32284-LS region	g6072	MFS domain-containing protein	Sugar (and other) transporter	NO	-/-	NO	NO
contig_32284-LS region	g6073	hypothetical protein	Oxidoreductase family, NAD-binding Rossmann fold;Oxidoreductase family, C-terminal alpha/beta domain	NO	-/-	NO	NO
contig_32284-LS region	g6074	hypothetical protein	-	NO	-/-	NO	NO
contig_32284-LS region	g6075	hypothetical protein	-	NO	-/-	NO	NO
contig_32284-LS region	g6076	Related to alcohol dehydrogenase homolog Bli-4	short chain dehydrogenase	NO	-/-	NO	NO
contig_32284-LS region	g6077	fungal specific transcription factor, putative	Fungal specific transcription factor domain;Fungal Zn(2)-Cys(6) binuclear cluster domain	NO	-/-	NO	NO
contig_32284-LS region	g6078	Short-chain dehydrogenase	short chain dehydrogenase	NO	-/-	NO	NO
contig_32284-LS region	g6079	Aldehyde dehydrogenase	Aldehyde dehydrogenase family	NO	-/-	NO	NO
contig_32284-LS region	g6080	Related to alcohol dehydrogenase homolog Bli-4	short chain dehydrogenase	NO	-/-	NO	NO
contig_32284-LS region	g6081	Major facilitator superfamily transporter	-	NO	-/-	NO	NO
contig_32284-LS region	g6082	Related to formaldehyde dehydrogenase	Zinc-binding dehydrogenase	NO	-/-	NO	NO
contig_32284-LS region	g6083	NmrA domain-containing protein	NmrA-like family	NO	-/-	NO	NO
contig_32284-LS region	g6084	CBM1 domain-containing protein	Fungal cellulose binding domain;Glycosyl hydrolase family 61	Signal peptide/0.9766	-/Y (0.846)	Apoplastic effector	AA9;CBM1
contig_32284-LS region	g6085	DDE_Tnp_1_7 domain-containing protein	Transposase IS4	NO	-/-	NO	NO
contig_32284-LS region	g6086	D-alanyl-D-alaninecarboxypeptidase/ D-alanyl-D-alanine-endopeptidase	D-Ala-D-Ala carboxypeptidase 3 (S13) family	NO	-/-	NO	NO
contig_32284-LS region	g6087	Aspergillus niger contig An06c0100, genomic contig	Glycosyl hydrolase family 3 N terminal domain	Signal peptide/0.7916	-/-	NO	NO
contig_32284-LS region	g6088	hypothetical protein	ABC transporter;ABC transporter transmembrane region;ABC transporter	NO	-/-	NO	NO
contig_32284-LS region	g6089	Gamma-glutamyltranspeptidase	Gamma-glutamyltranspeptidase	NO	-/-	NO	NO
contig_32284-LS region	g6090	Dipeptidase	Membrane dipeptidase (Peptidase family M19)	NO	-/-	NO	NO
contig_32284-LS region	g6091	Beta-lactamase family protein	Beta-lactamase	Signal peptide/0.9262	-/-	NO	NO
contig_32284-LS region	g6092	Isp4 protein	OPT oligopeptide transporter protein	NO	-/-	NO	NO
contig_32284-LS region	g6093	hypothetical protein	AMP-binding enzyme	NO	-/-	NO	NO
contig_32284-LS region	g6094	hypothetical protein	Enoyl-(Acyl carrier protein) reductase	NO	-/-	NO	NO
contig_32284-LS region	g6095	Abhydrolase_3 domain-containing protein	alpha/beta hydrolase fold	NO	-/-	NO	NO
contig_32284-LS region	g6096	hypothetical protein	Pyridine nucleotide-disulphide oxidoreductase	NO	-/-	NO	NO
contig_32284-LS region	g6097	Lactamase_B domain-containing protein	Metallo-beta-lactamase superfamily	NO	-/-	NO	NO
contig_32284-LS region	g6098	MFS domain-containing protein	Major Facilitator Superfamily	NO	-/-	NO	NO
contig_32284-LS region	g6099	Zn(2)-C6 fungal-type domain-containing protein	Fungal specific transcription factor domain	NO	-/-	NO	NO
contig_32284-LS region	g6100	hypothetical protein	Flavin-binding monooxygenase-like	NO	-/-	NO	NO
contig_32284-LS region	g6101	hypothetical protein	short chain dehydrogenase	NO	-/-	NO	NO
contig_32284-LS region	g6102	hypothetical protein	G protein-coupled glucose receptor regulating Gpa2;G protein-coupled glucose receptor regulating Gpa2 C-term	NO	-/-	NO	NO
contig_32284-LS region	g6103	Amb_all domain-containing protein	Pectate lyase	Signal peptide/0.9397	-/-	NO	PL1_4
contig_32284-LS region	g6104	hypothetical protein	Fungal specific transcription factor domain	NO	-/-	NO	NO
contig_32284-LS region	g6105	Beta-lactamase domain-containing protein	Beta-lactamase	NO	-/-	NO	NO
contig_32284-LS region	g6106	hypothetical protein	-	NO	-/-	NO	NO
contig_32284-LS region	g6107	Carboxylic ester hydrolase	Carboxylesterase family	Signal peptide/0.9909	-/-	NO	NO
contig_32284-LS region	g6108	Carboxylic ester hydrolase	Carboxylesterase family	NO	-/-	NO	NO
contig_32284-LS region	g6109	hypothetical protein	DDE superfamily endonuclease	NO	-/-	NO	NO
contig_32284-LS region	g6110	Pol-like protein	-	NO	-/-	NO	NO
contig_32284-LS region	g6111	Reverse transcriptase	Reverse transcriptase (RNA-dependent DNA polymerase);Integrase zinc binding domain;Integrase core domain;RNase H-like domain found in reverse transcriptase	NO	-/-	NO	NO
contig_32284-LS region	g6112	hypothetical protein	-	NO	-/-	NO	NO
contig_32284-LS region	g6113	hypothetical protein	fungal STAND N-terminal Goodbye domain;NACHT domain	NO	-/-	NO	NO
contig_32284-LS region	g6114	hypothetical protein	-	NO	-/-	NO	NO
contig_32284-LS region	g6115	MFS domain-containing protein	Major Facilitator Superfamily	NO	-/-	NO	NO
contig_32284-LS region	g6116	hypothetical protein	FAD binding domain	NO	-/-	NO	NO
contig_32284-LS region	g6117	MFS domain-containing protein	Major Facilitator Superfamily	NO	-/-	NO	GH28
contig_32284-LS region	g6118	hypothetical protein	CrtC N-terminal lipocalin domain	NO	-/-	NO	NO
contig_32284-LS region	g6119	MFS domain-containing protein	Major Facilitator Superfamily	NO	-/-	NO	NO
contig_32284-LS region	g6120	hypothetical protein	Clr5 domain	NO	-/-	NO	NO
contig_32284-LS region	g6121	hypothetical protein	-	NO	-/-	NO	NO
contig_32284-LS region	g6122	hypothetical protein	Major Facilitator Superfamily	NO	-/-	NO	NO
contig_32284-LS region	g6123	Amidase domain-containing protein	Fungal specific transcription factor domain;Amidase	NO	-/-	NO	NO
contig_32284-LS region	g6124	hypothetical protein	Protein HRI1	NO	-/-	NO	NO
contig_32284-LS region	g6125	Aa_trans domain-containing protein	Transmembrane amino acid transporter protein	NO	-/-	NO	NO
contig_32284-LS region	g6126	Aldedh domain-containing protein	Aldehyde dehydrogenase family	NO	-/-	NO	NO
contig_32284-LS region	g6127	hypothetical protein	Fungal specific transcription factor domain	NO	-/-	NO	NO
contig_32284-LS region	g6128	Alpha-L-rhamnosidase	Alpha-L-rhamnosidase N-terminal domain;Bacterial alpha-L-rhamnosidase C-terminal domain;Bacterial alpha-L-rhamnosidase concanavalin-like domain;Bacterial alpha-L-rhamnosidase 6 hairpin glycosidase domain	NO	-/-	NO	GH78
contig_32284-LS region	g6129	MFS domain-containing protein	Sugar (and other) transporter	NO	-/-	NO	NO
contig_32284-LS region	g6130	Epimerase domain-containing protein	NAD dependent epimerase/dehydratase family	NO	-/-	NO	NO
contig_32284-LS region	g6131	HET domain-containing protein	-	NO	-/-	NO	NO
contig_32284-LS region	g6132	Expressed protein	-	NO	-/-	NO	NO
contig_32284-LS region	g6133	Carboxylic ester hydrolase	Tannase and feruloyl esterase	Signal peptide/0.8823	-/-	NO	NO
contig_32284-LS region	g6134	Pc22g21310 protein	-	NO	-/-	NO	NO
contig_32284-LS region	g6135	hypothetical protein	-	NO	-/-	NO	NO
contig_32284-LS region	g6136	hypothetical protein	Acetoacetate decarboxylase (ADC)	NO	-/-	NO	NO
contig_32284-LS region	g6137	Short-chain dehydrogenase/reductase SDR	Enoyl-(Acyl carrier protein) reductase	NO	-/-	NO	NO
contig_32284-LS region	g6138	Succinate-semialdehyde dehydrogenase	Aldehyde dehydrogenase family	NO	-/-	NO	NO
contig_32284-LS region	g6139	hypothetical protein	Amino acid permease	NO	-/-	NO	NO
contig_32284-LS region	g6140	Acetoacetate decarboxylase	Acetoacetate decarboxylase (ADC)	NO	-/-	NO	NO
contig_32284-LS region	g6141	hypothetical protein	Amino acid permease	NO	-/-	NO	NO
contig_32284-LS region	g6142	hypothetical protein	OPT oligopeptide transporter protein	NO	-/-	NO	NO
contig_32284-LS region	g6143	hypothetical protein	Flavin-binding monooxygenase-like	NO	-/-	NO	NO
contig_32284-LS region	g6144	hypothetical protein	-	NO	-/-	NO	NO
contig_32284-LS region	g6145	Arylacetonitrilase	Carbon-nitrogen hydrolase	NO	-/-	NO	NO
contig_32284-LS region	g6146	hypothetical protein	-	Signal peptide/0.9801	-/-	NO	NO
contig_32284-LS region	g6147	hypothetical protein	-	NO	-/-	NO	NO
contig_32284-LS region	g6148	hypothetical protein	-	Signal peptide/0.9869	Y (0.803)/Y (0.979)	Apoplastic/cytoplasmic effector	NO
contig_32284-LS region	g6149	hypothetical protein	-	NO	-/-	NO	NO
contig_32284-LS region	g6150	FAD_binding_2 domain-containing protein	FAD binding domain	NO	-/-	NO	NO
contig_32284-LS region	g6151	NhNPS4	Phosphopantetheine attachment site;Condensation domain;AMP-binding enzyme	NO	-/-	NO	NO
contig_32284-LS region	g6152	hypothetical protein	-	NO	-/-	NO	NO
contig_32284-LS region	g6153	hypothetical protein	ABC transporter;ABC transporter transmembrane region;ABC transporter	NO	-/-	NO	NO
contig_32284-LS region	g6154	Amine oxidase	Domain of unknown function (DUF1965);Copper amine oxidase, N2 domain;Copper amine oxidase, enzyme domain	Signal peptide/0.9886	-/-	NO	NO
contig_32284-LS region	g6155	Amine oxidase	Copper amine oxidase, enzyme domain	NO	-/-	NO	NO
contig_32284-LS region	g6156	hypothetical protein	-	Signal peptide/0.9945	-/Y (0.732)	Apoplastic effector	NO
contig_32284-LS region	g6157	hypothetical protein	Sugar (and other) transporter	NO	-/-	NO	NO
contig_32284-LS region	g6158	MFS domain-containing protein	Major Facilitator Superfamily	NO	-/-	NO	NO
contig_32284-LS region	g6159	hypothetical protein	-	Signal peptide/0.6943	-/-	NO	NO
contig_32284-LS region	g6160	hypothetical protein	Sugar-binding N-terminal domain;NAD binding domain of 6-phosphogluconate dehydrogenase;Nucleotide-binding C-terminal domain;NAD-binding of NADP-dependent 3-hydroxyisobutyrate dehydrogenase	NO	-/-	NO	NO
contig_32284-LS region	g6161	Major facilitator superfamily transporter	Major Facilitator Superfamily	NO	-/-	NO	NO
contig_32284-LS region	g6162	Zn(2)-C6 fungal-type domain-containing protein	Fungal specific transcription factor domain	NO	-/-	NO	NO
contig_32284-LS region	g6163	hypothetical protein	-	NO	-/-	NO	NO
contig_32284-LS region	g6164	hypothetical protein	FAD dependent oxidoreductase	NO	-/-	NO	NO
contig_32284-LS region	g6165	Enoyl-CoA hydratase	Enoyl-CoA hydratase/isomerase	NO	-/-	NO	NO
contig_32284-LS region	g6166	hypothetical protein	Alcohol acetyltransferase	NO	-/-	NO	NO
contig_32284-LS region	g6167	Dehydrogenase RED2	short chain dehydrogenase	NO	-/-	NO	NO
contig_32284-LS region	g6168	hypothetical protein	-	NO	-/-	NO	NO
contig_32284-LS region	g6169	Amine oxidase	Flavin containing amine oxidoreductase	NO	-/-	NO	NO
contig_32284-LS region	g6170	SnoaL-like domain-containing protein	SnoaL-like domain	NO	-/-	NO	NO
contig_32284-LS region	g6171	Amidohydrolase	Amidohydrolase family	NO	-/-	NO	NO
contig_32284-LS region	g6172	hypothetical protein	Major Facilitator Superfamily	NO	-/-	NO	NO
contig_32284-LS region	g6173	Pc22g21580 protein	Major Facilitator Superfamily	NO	-/-	NO	NO
contig_32284-LS region	g6174	MFS domain-containing protein	Fungal trichothecene efflux pump (TRI12)	NO	-/-	NO	NO
contig_32284-LS region	g6175	Glutamate decarboxylase	Pyridoxal-dependent decarboxylase conserved domain	NO	-/-	NO	NO
contig_32284-LS region	g6176	MFS domain-containing protein	Sugar (and other) transporter	NO	-/-	NO	NO
contig_32284-LS region	g6177	hypothetical protein	Protein of unknown function (DUF1479)	NO	-/-	NO	NO
contig_32284-LS region	g6178	Guanine deaminase	Amidohydrolase family	NO	-/-	NO	NO
contig_32284-LS region	g6179	hypothetical protein	-	NO	-/-	NO	NO
contig_32284-LS region	g6180	Fungal_trans domain-containing protein	-	NO	-/-	NO	NO
contig_32284-LS region	g6181	Malate dehydrogenase	lactate/malate dehydrogenase, NAD binding domain;lactate/malate dehydrogenase, alpha/beta C-terminal domain	NO	-/-	NO	NO
contig_32284-LS region	g6182	hypothetical protein	D-isomer specific 2-hydroxyacid dehydrogenase, catalytic domain;D-isomer specific 2-hydroxyacid dehydrogenase, NAD binding domain	NO	-/-	NO	NO
contig_32284-LS region	g6183	hypothetical protein	-	NO	-/-	NO	NO
contig_32284-LS region	g6184	hypothetical protein	-	NO	-/-	NO	NO
contig_32284-LS region	g6185	hypothetical protein	-	NO	-/-	NO	NO
contig_32284-LS region	g6186	hypothetical protein	Fungal specific transcription factor domain;Fungal Zn(2)-Cys(6) binuclear cluster domain	NO	-/-	NO	NO
contig_32284-LS region	g6187	hypothetical protein	PrpF protein	NO	-/-	NO	NO
contig_32284-LS region	g6188	hypothetical protein	-	NO	-/-	NO	NO
contig_32284-LS region	g6189	hypothetical protein	-	NO	-/-	NO	NO
contig_32284-LS region	g6190	hypothetical protein	Fungal specific transcription factor domain;Fungal Zn(2)-Cys(6) binuclear cluster domain	NO	-/-	NO	NO
contig_32284-LS region	g6191	hypothetical protein	Retinal pigment epithelial membrane protein	NO	-/-	NO	NO
contig_32284-LS region	g6192	MFS domain-containing protein	Sugar (and other) transporter	NO	-/-	NO	NO
contig_32284-LS region	g6193	hypothetical protein	Phytanoyl-CoA dioxygenase (PhyH)	NO	-/-	NO	NO
contig_32284-LS region	g6194	hypothetical protein	Phytanoyl-CoA dioxygenase (PhyH)	NO	-/-	NO	NO
contig_32284-LS region	g6195	hypothetical protein	Fungal specific transcription factor domain	NO	-/-	NO	NO
contig_32284-LS region	g6196	hypothetical protein	Amino acid permease	NO	-/-	NO	NO
contig_32284-LS region	g6197	MFS domain-containing protein	Major Facilitator Superfamily	NO	-/-	NO	NO
contig_32284-LS region	g6198	hypothetical protein	-	Signal peptide/0.9872	-/Y (0.531)	Apoplastic effector	NO
contig_32284-LS region	g6199	MFS domain-containing protein	Major Facilitator Superfamily	NO	-/-	NO	NO
contig_32284-LS region	g6200	hypothetical protein	Methyltransferase domain	NO	-/-	NO	NO
contig_32284-LS region	g6201	A_deaminase domain-containing protein	Adenosine/AMP deaminase	NO	-/-	NO	NO
contig_32284-LS region	g6202	hypothetical protein	Cytochrome P450	NO	-/-	NO	NO
contig_32284-LS region	g6203	Hypothetical protein	Fungal specific transcription factor domain;Fungal Zn(2)-Cys(6) binuclear cluster domain;Cytochrome P450	NO	-/-	NO	NO
contig_32284-LS region	g6204	Hypothetical protein	Alcohol dehydrogenase GroES-like domain;Zinc-binding dehydrogenase	NO	-/-	NO	NO
contig_32284-LS region	g6205	1,3-beta-D-glucan-UDP glucosyltransferase	1,3-beta-glucan synthase component;1,3-beta-glucan synthase subunit FKS1, domain-1	NO	-/-	NO	GT48
contig_32284-LS region	g6206	Zn(2)-C6 fungal-type domain-containing protein	Fungal Zn(2)-Cys(6) binuclear cluster domain	NO	-/-	NO	NO
contig_32284-LS region	g6207	Tubulin beta chain	Tubulin C-terminal domain;Tubulin/FtsZ family, GTPase domain	NO	-/-	NO	NO
contig_32284-LS region	g6208	AA_permease domain-containing protein	Amino acid permease	NO	-/-	NO	NO
contig_32284-LS region	g6209	hypothetical protein	-	NO	-/-	NO	NO
contig_32284-LS region	g6210	hypothetical protein	Peptidase A4 family	Signal peptide/0.8992	-/Y (0.678)	Apoplastic effector	NO
contig_32284-LS region	g6211	hypothetical protein	Heterokaryon incompatibility protein Het-C	NO	-/-	NO	NO
contig_32284-LS region	g6212	hypothetical protein	-	NO	-/-	NO	NO
contig_32284-LS region	g6213	hypothetical protein	Fn3-like domain	NO	-/-	NO	NO
contig_32284-LS region	g6214	hypothetical protein	Subtilase family	Signal peptide/0.9907	-/-	NO	NO
contig_32284-LS region	g6215	hypothetical protein	-	NO	-/-	NO	NO
contig_32284-LS region	g6216	Hypothetical protein	-	NO	-/-	NO	NO
contig_32284-LS region	g6217	MFS domain-containing protein	Sugar (and other) transporter	NO	-/-	NO	NO
contig_32284-LS region	g6218	hypothetical protein	Protein of unknown function (DUF1479)	NO	-/-	NO	NO
contig_32284-LS region	g6219	Zn(2)-C6 fungal-type domain-containing protein	Fungal specific transcription factor domain	NO	-/-	NO	NO
contig_32284-LS region	g6220	hypothetical protein	Endoribonuclease L-PSP	NO	-/-	NO	NO
contig_32284-LS region	g6221	AB hydrolase-1 domain-containing protein	alpha/beta hydrolase fold	NO	-/-	NO	NO
contig_32284-LS region	g6222	Amidase domain-containing protein	Amidase	NO	-/-	NO	NO
contig_32284-LS region	g6223	hypothetical protein	Cytochrome P450	NO	-/-	NO	NO
contig_32284-LS region	g6224	hypothetical protein	-	NO	-/-	NO	NO
contig_32284-LS region	g6225	L-fuconate dehydratase	Enolase C-terminal domain-like;Mandelate racemase / muconate lactonizing enzyme, N-terminal domain	NO	-/-	NO	NO
contig_32284-LS region	g6226	Aldo_ket_red domain-containing protein	Aldo/keto reductase family	NO	-/-	NO	NO
contig_32284-LS region	g6227	Amino acid transporter	Common central domain of tyrosinase	NO	-/-	NO	NO
contig_32284-LS region	g6228	Cocaine esterase	X-Pro dipeptidyl-peptidase (S15 family)	NO	-/-	NO	NO
contig_32284-LS region	g6229	hypothetical protein	FAD binding domain	NO	-/-	NO	NO
contig_32284-LS region	g6230	hypothetical protein	-	NO	-/-	NO	NO
contig_32284-LS region	g6231	hypothetical protein	-	NO	-/-	NO	NO
contig_32284-LS region	g6232	hypothetical protein	-	NO	-/-	NO	NO
contig_32284-LS region	g6233	Sulfatase domain-containing protein	Sulfatase	NO	-/-	NO	NO
contig_32284-LS region	g6234	Chitinase	Glycosyl hydrolases family 18;Glycosyl hydrolases family 18;Chitin recognition protein	NO	-/-	NO	CBM18;GH18
contig_32284-LS region	g6235	LysM domain protein	Pectate lyase superfamily protein	Signal peptide/0.984	-/-	NO	NO
contig_32284-LS region	g6236	LysM domain protein	LysM domain;Pectate lyase superfamily protein	NO	-/-	NO	GH55
contig_32284-LS region	g6237	hypothetical protein	-	NO	-/-	NO	NO
contig_32284-LS region	g6238	Hypothetical protein	Aegerolysin	NO	-/-	NO	NO
contig_32284-LS region	g6239	hypothetical protein	-	NO	-/-	NO	NO
contig_32284-LS region	g6240	PNP_UDP_1 domain-containing protein	Phosphorylase superfamily	NO	-/-	NO	NO
contig_32284-LS region	g6241	hypothetical protein	-	NO	-/-	NO	NO
contig_32284-LS region	g6242	Zn(2)-C6 fungal-type domain-containing protein	-	NO	-/-	NO	NO
contig_32284-LS region	g6243	hypothetical protein	-	NO	-/-	NO	NO
contig_32284-LS region	g6244	hypothetical protein	Beta-ketoacyl synthase, N-terminal domain	NO	-/-	NO	NO
contig_32284-LS region	g6245	hypothetical protein	Chalcone and stilbene synthases, C-terminal domain;Chalcone and stilbene synthases, N-terminal domain	NO	-/-	NO	NO
contig_32284-LS region	g6246	hypothetical protein	Cytochrome P450	NO	-/-	NO	NO
contig_32284-LS region	g6247	FAD_binding_3 domain-containing protein	FAD binding domain	NO	-/-	NO	NO
contig_32284-LS region	g6248	Methyltransf_2 domain-containing protein	O-methyltransferase domain	NO	-/-	NO	NO
contig_32284-LS region	g6249	hypothetical protein	-	NO	-/-	NO	NO
contig_32284-LS region	g6250	hypothetical protein	ABC transporter;ABC transporter;ABC transporter transmembrane region	NO	-/-	NO	NO
contig_32284-LS region	g6251	hypothetical protein	Sulfotransferase domain	NO	-/-	NO	NO
contig_32284-LS region	g6252	hypothetical protein	Eukaryotic elongation factor 1 beta central acidic region;EF-1 guanine nucleotide exchange domain	NO	-/-	NO	NO
contig_32284-LS region	g6253	hypothetical protein	-	NO	-/-	NO	NO
contig_32284-LS region	g6254	hypothetical protein	Beta-ketoacyl synthase, N-terminal domain;Protein kinase domain	NO	-/-	NO	NO
contig_32284-LS region	g6255	hypothetical protein	Beta-ketoacyl synthase, C-terminal domain;Acyl transferase domain;Ketoacyl-synthetase C-terminal extension;Phosphopantetheine attachment site;Alcohol dehydrogenase GroES-like domain;KR domain;Methyltransferase domain;Polyketide synthase dehydratase;Zinc-binding dehydrogenase	NO	-/-	NO	NO
contig_32284-LS region	g6256	hypothetical protein	-	NO	-/-	NO	NO
contig_32284-LS region	g6257	hypothetical protein	-	NO	-/-	NO	NO
contig_32284-LS region	g6258	hypothetical protein	Multicopper oxidase;Multicopper oxidase	NO	-/-	NO	NO
contig_32284-LS region	g6259	hypothetical protein	FAD dependent oxidoreductase	NO	-/-	NO	NO
contig_32284-LS region	g6260	Fungal_trans domain-containing protein	Fungal specific transcription factor domain	NO	-/-	NO	NO
contig_32284-LS region	g6261	MFS domain-containing protein	Major Facilitator Superfamily	NO	-/-	NO	NO
contig_32284-LS region	g6262	hypothetical protein	-	NO	-/-	NO	NO
contig_32284-LS region	g6263	hypothetical protein	-	NO	-/-	NO	NO
contig_32284-LS region	g6264	hypothetical protein	-	NO	-/-	NO	NO
contig_32284-LS region	g6265	hypothetical protein	-	NO	-/-	NO	NO
contig_32284-LS region	g6266	hypothetical protein	-	Signal peptide/0.9523	-/-	NO	NO
contig_32284-LS region	g6267	hypothetical protein	-	NO	-/-	NO	NO
contig_32284-LS region	g6268	hypothetical protein	Ulp1 protease family, C-terminal catalytic domain	NO	-/-	NO	NO
contig_32284-LS region	g6269	L-ornithine N(5)-monooxygenase	-	NO	-/-	NO	NO
contig_32284-LS region	g6270	hypothetical protein	AMP-binding enzyme	Signal peptide/0.542	-/-	NO	NO
contig_32284-LS region	g6271	hypothetical protein	-	NO	-/-	NO	NO
contig_32284-LS region	g6272	hypothetical protein	Methyltransferase domain	NO	-/-	NO	NO
contig_32284-LS region	g6273	CCHC-type domain-containing protein	DDE superfamily endonuclease	NO	-/-	NO	NO
contig_32284-LS region	g6274	Dimer_Tnp_hAT domain-containing protein	-	NO	-/-	NO	NO
contig_32284-LS region	g6275	hypothetical protein	-	NO	-/-	NO	NO
contig_32284-LS region	g6276	hypothetical protein	-	NO	-/-	NO	NO
contig_32284-LS region	g6277	hypothetical protein	-	NO	-/-	NO	NO
contig_32530-LS region	g8203	hypothetical protein	-	NO	-/-	NO	NO
contig_32530-LS region	g8204	ANK_REP_REGION domain-containing protein	-	NO	-/-	NO	NO
contig_32530-LS region	g8205	Related to SKI2-antiviral protein and putative helicase	-	NO	-/-	NO	NO
contig_32530-LS region	g8206	hypothetical protein	-	NO	-/-	NO	NO
contig_32530-LS region	g8207	Cytochrome P450 monooygenase 2	Cytochrome P450	NO	-/-	NO	NO
contig_32522-LS region	g10417	Bifunctional ent-kaurene synthase	-	NO	-/-	NO	NO
contig_32522-LS region	g10418	2-oxoglutarate-dependent ethylene/succinate-forming enzyme	2OG-Fe(II) oxygenase superfamily;non-haem dioxygenase in morphine synthesis N-terminal	NO	-/-	NO	NO
contig_32522-LS region	g10419	hypothetical protein	-	NO	-/-	NO	NO
contig_32522-LS region	g10420	Transcription factor jumonji	-	NO	-/-	NO	NO
contig_32522-LS region	g10421	hypothetical protein	-	NO	-/-	NO	NO
contig_32522-LS region	g10422	hypothetical protein	-	NO	-/-	NO	NO
contig_32442-LS region	g4799	Heterokaryon incompatibility	Heterokaryon incompatibility protein (HET)	NO	-/-	NO	NO
contig_32442-LS region	g4800	Helicase ATP-binding domain-containing protein	-	NO	-/-	NO	NO
contig_32442-LS region	g4801	hypothetical protein	-	NO	-/-	NO	NO
contig_32442-LS region	g4802	hypothetical protein	-	NO	-/-	NO	NO
contig_32442-LS region	g4803	hypothetical protein	-	NO	-/-	NO	NO
contig_32442-LS region	g4804	hypothetical protein	-	NO	-/-	NO	NO
contig_32356-LS region	g13697	Reverse transcriptase	RNase H-like domain found in reverse transcriptase	NO	-/-	NO	NO
contig_32356-LS region	g13698	hypothetical protein	-	NO	-/-	NO	NO
contig_32356-LS region	g13699	Pol polyprotein	RNase H-like domain found in reverse transcriptase	NO	-/-	NO	NO
contig_32356-LS region	g13700	Reverse transcriptase	Retrotransposon gag protein	NO	-/-	NO	NO
contig_32356-LS region	g13701	Zn(2)-C6 fungal-type domain-containing protein	Fungal specific transcription factor domain	NO	-/-	NO	NO
contig_32356-LS region	g13702	DAO domain-containing protein	FAD dependent oxidoreductase	NO	-/-	NO	NO
contig_32356-LS region	g13703	hypothetical protein	Flavin containing amine oxidoreductase	NO	-/-	NO	NO
contig_32356-LS region	g13704	hypothetical protein	-	NO	-/-	NO	NO
contig_32356-LS region	g13705	Goodbye domain-containing protein	fungal STAND N-terminal Goodbye domain;NACHT domain	NO	-/-	NO	NO
contig_32356-LS region	g13706	NACHT domain-containing protein	-	NO	-/-	NO	NO
contig_32356-LS region	g13707	Alpha-ketoglutarate dependent xanthine dioxygenase	Taurine catabolism dioxygenase TauD, TfdA family	NO	-/-	NO	NO
contig_32356-LS region	g13708	C6 zinc finger domain-containing protein	-	NO	-/-	NO	NO
contig_32356-LS region	g13709	hypothetical protein	Ankyrin repeats (3 copies);Phosphorylase superfamily;NACHT domain;Ankyrin repeat	NO	-/-	NO	NO
contig_32356-LS region	g13710	hypothetical protein	Helicase conserved C-terminal domain;DEAD/DEAH box helicase	NO	-/-	NO	NO
contig_32356-LS region	g13711	hypothetical protein	-	NO	-/-	NO	NO
contig_32474-LS region	NO gene			NO	-/-	NO	NO
contig_32382-LS region	NO gene			NO	-/-	NO	NO
contig_32326-LS region	NO gene			NO	-/-	NO	NO
contig_32268-LS region	NO gene			NO	-/-	NO	NO
contig_32266-LS region	NO gene			NO	-/-	NO	NO
contig_32264-LS region	NO gene			NO	-/-	NO	NO
contig_32262-LS region	NO gene			NO	-/-	NO	NO
contig_32260-LS region	NO gene			NO	-/-	NO	NO
